# Supplementary material for: Reactivity of an aryl-substituted silicon–silicon triple bond: 1,2-disilabenzenes from the reactions of a 1,2-diaryldisilyne with alkynes
Source: Royal Society of Chemistry journal article supplement (doi:10.1039/c0dt00115e), 2010-01-01
Supplement: c0dt00115e.pdf [file c0dt00115e.pdf]

Supporting Information for

Reactivity of an aryl-substituted silicon–silicon triple bond:  
1,2-Disilabenzenes from the reaction of a 1,2-diaryldisilyne  
with alkynes

*Joon Soo Han, Takahiro Sasamori, Yoshiyuki Mizuhata, and Norihiro Tokitoh\**

Institute for Chemical Research, Kyoto University, Gokasho, Uji, Kyoto 611-0011, Japan

\* To whom correspondence should be addressed. Phone: +81-774-38-3200. Fax: +81-774-38-3209.

E-mail: tokitoh@boc.kuicr.kyoto-u.ac.jp

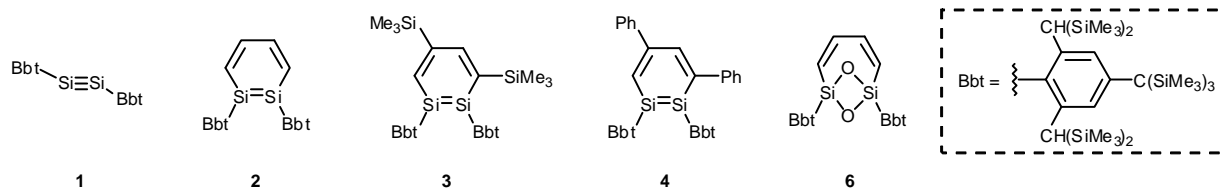

## Experimental Section

**General Procedure.** All experiments were performed under an argon atmosphere unless otherwise noted. All solvents were purified by standard methods and/or The Ultimate Solvent System (Glass Contour Company)<sup>S1</sup> prior to use. NMR spectra were recorded on a JEOL JNM AL-300 spectrometer (300 MHz for  $^1\text{H}$ ; 75 MHz for  $^{13}\text{C}$  NMR; 59 MHz for  $^{29}\text{Si}$  NMR) using a  $\text{C}_6\text{D}_6$  as a solvent. The chemical shifts are given in ppm relative to the standard as follows: residual  $\text{C}_6\text{D}_5\text{H}$  7.16 ppm for  $^1\text{H}$  NMR spectra,  $\text{C}_6\text{D}_6$  central transition 128.0 ppm for  $^{13}\text{C}$  NMR spectra, and external  $\text{SiMe}_4$  0.0 ppm for  $^{29}\text{Si}$  spectra. Multiplicity of signals in  $^{13}\text{C}$  NMR spectra was determined by DEPT technique. High-resolution mass spectral data were obtained on a JEOL JMS-700 spectrometer (FAB) or a Bruker micrOTOF (APPI-TOF). UV/Vis spectra were measured by a JASCO Ubest V-570. Melting points (uncorrected) were measured with a Yanaco micro melting point apparatus using sealed capillary tubes. Compound **1** was prepared according to the reported procedure.<sup>S2</sup>

**Reaction of 1 with acetylene.** Acetylene gas was generated by treating calcium carbide with degassed water under anaerobic condition, and dried through a column of phosphorus pentoxide. A valved NMR tube was charged with 20.2 mg (15.5  $\mu\text{mol}$ ) of **1** and 0.4 mL of *n*-hexane, and the solution was degassed by freeze-pump-thaw cycles. The solution was exposed to acetylene gas (1 atm) and shaken briefly at room temperature. The dark yellow color of the solution faded, and a light-yellow solution was obtained after 5 min. Volatiles were removed under vacuum, and the light-yellow residue

was checked by NMR. The crude product was recrystallized from *n*-hexane. 13.2 mg (9.73  $\mu$ mol, 63%) of **2** was afforded as light-yellow needles. **2**: Light-yellow crystals mp 317–318 °C (dec.);  $^1\text{H}$  NMR (400 MHz,  $\text{C}_6\text{D}_6$ )  $\delta$  0.297, 0.301 (s, 72H,  $\text{CH}(\text{SiMe}_3)_2$ ), 0.40 (s, 54H,  $\text{C}(\text{SiMe}_3)_3$ ), 2.98 (s, 4H,  $\text{CHSi}$ ), 7.05 (s, 4H, Bbt ArH), 7.61–7.68 (m, 2H,  $\text{CH}=\text{CH}$ ), 7.72–7.79 (m, 2H,  $\text{CH}=\text{CH}$ );  $^1\text{H}$  NMR (300 MHz,  $\text{C}_6\text{D}_{12}$ )  $\delta$  0.10, 0.11 (s, 72H,  $\text{CH}(\text{SiMe}_3)_2$ ), 0.33 (s, 54H,  $\text{C}(\text{SiMe}_3)_3$ ), 2.77 (s, 4H,  $\text{CHSi}$ ), 6.89 (s, 4H, Bbt ArH), 7.46 (s, 4H,  $\text{CH}=\text{CH}$ );  $^{13}\text{C}$  NMR (75 MHz,  $\text{C}_6\text{D}_6$ )  $\delta$  2.6, 3.1 ( $\text{CH}(\text{SiMe}_3)_2$ ), 5.9 ( $\text{C}(\text{SiMe}_3)_3$ ), 22.7 ( $\text{C}(\text{SiMe}_3)_3$ ), 37.2 ( $\text{CHSiMe}_3$ ), 127.2 (BbtC(3,5)), 135.3 (BbtC(1)), 135.8 ( $\text{CH}=\text{CH}$ ), 146.3 ( $\text{CH}=\text{CH}$ ), 148.0 (BbtC(4)), 152.6 (BbtC(2,6));  $^{13}\text{C}$  NMR (75 MHz,  $\text{C}_6\text{D}_{12}$ )  $\delta$  2.8, 3.3 ( $\text{CH}(\text{SiMe}_3)_2$ ), 6.2 ( $\text{C}(\text{SiMe}_3)_3$ ), 23.5 ( $\text{C}(\text{SiMe}_3)_3$ ), 37.6 ( $\text{CHSiMe}_3$ ), 127.7 (BbtC(3,5)), 135.9 (BbtC(1)), 136.0 ( $\text{CH}=\text{CH}$ ), 146.7 ( $\text{CH}=\text{CH}$ ), 148.3 (BbtC(4)), 153.0 (BbtC(2,6));  $^{29}\text{Si}$  NMR (59 MHz,  $\text{C}_6\text{D}_6$ )  $\delta$  1.0 ( $\text{C}(\text{SiMe}_3)_3$ ), 1.5, 2.4 ( $\text{CH}(\text{SiMe}_3)_2$ ), 57.1 ( $\text{Si}=\text{Si}$ );  $^{29}\text{Si}$  NMR (59 MHz,  $\text{C}_6\text{D}_{12}$ )  $\delta$  0.9 ( $\text{C}(\text{SiMe}_3)_3$ ), 1.4, 2.3 ( $\text{CH}(\text{SiMe}_3)_2$ ), 56.8 ( $\text{Si}=\text{Si}$ ); UV/Vis (*n*-hexane)  $\lambda_{\text{max}}$  (*n*-hexane)/nm 378 ( $\epsilon/\text{dm}^3 \text{ mol}^{-1} \text{ cm}^{-1}$   $1.1 \times 10^4$ ); HRMS (ESI,  $[\text{M}+\text{H}]^+$ ,  $m/z$ ) Calcd for  $\text{C}_{64}\text{H}_{139}\text{Si}_{16}$  1355.7180, obsd: 1355.7129.

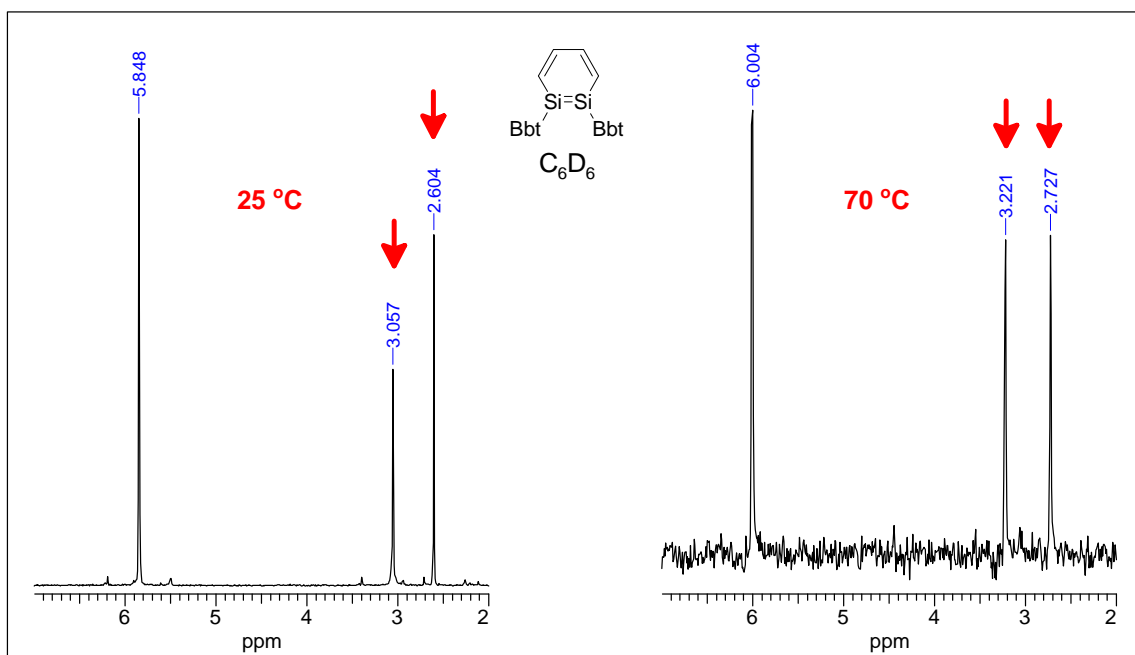

**Fig. S-1.**  $^{13}\text{C}$  NMR spectra for **2** (trimethylsilyl regions) at room and elevated temperatures. The trimethylsilyl groups on *ortho* positions of Bbt groups were observed as two peaks due to the trans-bent character of **2**.

**Reaction of 1 with trimethylsilylacetylene.** To a *n*-hexane solution (0.4 mL) of **1** (20.2 mg, 15.5  $\mu\text{mol}$ ) was added 8.7  $\mu\text{L}$  (61.9  $\mu\text{mol}$ ) of trimethylsilylacetylene. After the solution was stood at room temperature for 4 hr, an orange-yellow solution was obtained. Volatiles were removed under vacuum and the residue was analyzed by NMR ( $\text{C}_6\text{D}_6$ ). Its NMR spectra suggested the formation of **3** as a major product. The crude product was recrystallized from *n*-hexane. 57.0 mg (38.0  $\mu\text{mol}$ , 25%) of pure **3** was afforded as orange-yellow crystals. **3**: Orange-yellow crystals slowly changed to a green solid over 179  $^\circ\text{C}$ ;  $^1\text{H}$  NMR (300 MHz,  $\text{C}_6\text{D}_6$ )  $\delta$  0.24 (s, 27H,  $\text{CH}(\text{SiMe}_3)_2$ , ring  $\text{SiMe}_3$ ), 0.27 (s, 18H,  $\text{CH}(\text{SiMe}_3)_2$ ), 0.38 (br s, 45H,  $\text{CH}(\text{SiMe}_3)_2$ ,  $\text{C}(\text{SiMe}_3)_3$ ), 0.40 (s, 18H,  $\text{CH}(\text{SiMe}_3)_2$ ), 0.43 (s, 27H,  $\text{C}(\text{SiMe}_3)_3$ ), 0.48 (br s, 9H, ring  $\text{SiMe}_3$ ), 2.65 (br s, 2H,  $\text{CHSi}$ ), 2.84 (br s, 2H,  $\text{CHSi}$ ), 7.00 (s, 2H, Bbt  $\text{ArH}$ ), 7.02 (s, 2H, Bbt  $\text{ArH}$ ), 8.28 (s, 1H, ring  $\text{CH}$ ), 8.35 (s, 1H, ring  $\text{CH}$ );  $^{13}\text{C}$  NMR (75 MHz,  $\text{C}_6\text{D}_6$ )  $\delta$  0.6, 3.3, 3.5, 3.97, 4.01, 4.3, ( $\text{CH}(\text{SiMe}_3)_2$ , ring  $\text{SiMe}_3$ ), 5.4, 6.0 ( $\text{C}(\text{SiMe}_3)_3$ ), 22.1, 22.6 ( $\text{C}(\text{SiMe}_3)_3$ ), 36.2 ( $\text{CHSiMe}_3$ ), 127.2 (d, BbtC(3,5)), 128.3 (d, BbtC(3,5)), 128.7 (s), 133.9 (s), 134.8 (s), 144.8 (d, ring  $\text{CH}$ ), 147.1 (s), 148.0 (s), 148.4 (s), 150.3 (s), 153.0 (s), 153.3 (d, ring  $\text{CH}$ );  $^{29}\text{Si}$  NMR (59 MHz,  $\text{C}_6\text{D}_6$ )  $\delta$  0.87, 0.93 ( $\text{C}(\text{SiMe}_3)_3$ ), -2.2, 0.3, 0.8, 2.2, 2.5, 3.6 ( $\text{CH}(\text{SiMe}_3)_2$ , ring  $\text{SiMe}_3$ ), 64.1, 65.4 ( $\text{Si}=\text{Si}$ ); HRMS (ESI,  $[\text{M}+\text{H}]^+$ ,  $m/z$ ) Calcd for  $\text{C}_{70}\text{H}_{155}\text{Si}_{18}$  1499.7970, obsd: 1499.7985.

**Reaction of 1 with phenylacetylene.** To a *n*-hexane solution (0.4 mL) of **1** (15.9 mg, 12.2  $\mu\text{mol}$ ) was added 5.4  $\mu\text{L}$  (48.7  $\mu\text{mol}$ ) of phenylacetylene. After the solution was stood at room temperature for 2 hr, an orange solution was obtained. Volatiles were removed under vacuum and the residue was analyzed by NMR ( $\text{C}_6\text{D}_6$ ). Its NMR spectra suggested formation of 3,5-diphenyl-1,2-bis(Bbt)-1,2-

disilabenzene (**4**) as a major product. All attempts for isolation of the product by recrystallization were failed due to high solubility and low crystallinity. The NMR data of **4** were collected from the crude mixture. **4**:  $^1\text{H}$  NMR (300 MHz,  $\text{C}_6\text{D}_6$ )  $\delta$  0.07, 0.25, 0.29, 0.34 (s $\times$ 4, 18 $\times$ 4H,  $\text{CH}(\text{SiMe}_3)_2$ ), 0.38, 0.40 (s $\times$ 2, 27 $\times$ 2H,  $\text{C}(\text{SiMe}_3)_3$ ), 2.83 (s, 2H,  $\text{CHSi}$ ), 2.93 (br s, 2H,  $\text{CHSi}$ ), 7.03 (s, 4H, Bbt  $\text{ArH}$ ), 6.96-7.13 (m, 4H,  $\text{PhH}$ ), 7.24-7.31 (m, 4H,  $\text{PhH}$ ), 7.51 (d,  $^3J = 7.5$  Hz, 2H,  $\text{PhH}$ ), 7.76 (d,  $^3J = 7.2$  Hz, 2H,  $\text{PhH}$ ), 8.21 (d,  $^4J = 2.2$  Hz, 1H, ring  $\text{CH}$ ), 8.26 (d  $^4J = 2.2$  Hz, 1H, ring  $\text{CH}$ );  $^{13}\text{C}$  NMR (75 MHz,  $\text{C}_6\text{D}_6$ )  $\delta$  2.7, 2.8, 3.7, 4.0 ( $\text{CH}(\text{SiMe}_3)_2$ ), 5.8, 6.0 ( $\text{C}(\text{SiMe}_3)_3$ ), 22.8, 22.9 ( $\text{C}(\text{SiMe}_3)_3$ ), 35.8, 35.9 ( $\text{CHSiMe}_3$ ), 126.4 (s), 126.6 (s), 127.8 (d), 128.8 (d) 129.1 (d), 131.4 (s), 131.7 (d), 132.5 (s), 134.0 (s), 139.5 (d), 145.7 (s), 146.2 (s), 147.7 (s), 148.0 (s), 148.2 (s), 148.5 (s), 152.6 (s), 153.3 (s), 157.3 (s);  $^{29}\text{Si}$  NMR (59 MHz,  $\text{C}_6\text{D}_6$ )  $\delta$  0.8, 1.0 ( $\text{C}(\text{SiMe}_3)_3$ ), 1.1, 1.3, 2.2, 3.4 ( $\text{CH}(\text{SiMe}_3)_2$ ), 55.0, 61.7 ( $\text{Si}=\text{Si}$ ).

**Reaction of 1 with 1,7-octadiyne.** To a *n*-hexane solution (0.4 mL) of **1** (29.6 mg, 22.7  $\mu\text{mol}$ ) was added 5.9  $\mu\text{L}$  (45  $\mu\text{mol}$ ) of 1,7-octadiyne. After the solution was stood at 3  $^\circ\text{C}$  for 12 hr, a light-yellow solution was obtained. Volatiles were removed under vacuum and the residue was analyzed by NMR ( $\text{C}_6\text{D}_6$ ). Its NMR spectra suggested formation of a complex mixture.

**Reaction of 1 with bis(trimethylsilyl)acetylene.** By the similar procedure for **1** with trimethylsilylacetylene, a *n*-hexane solution of **1** was reacted with 4 equiv of bis(trimethylsilyl)acetylene. After 8 hr at room temperature, volatiles were removed under vacuum. No change was observed in  $^1\text{H}$  NMR spectrum.

**Reaction of 2 with oxygen.** A valved NMR tube was charged with 10.5 mg (7.74  $\mu\text{mol}$ ) of **2** and 0.4 mL of  $\text{C}_6\text{D}_6$ , and the solution was degassed by freeze-pump-thaw cycles. The solution was exposed to dry oxygen gas (1 atm) and shaken briefly at room temperature. The dark yellow color of the solution

faded immediately, and a colorless solution was obtained after 1 min. The reaction mixture was checked by NMR, and it was confirmed that **2** changed to **6** quantitatively. **6**: Colorless crystals mp 340–1 °C;  $^1\text{H}$  NMR (300 MHz,  $\text{C}_6\text{D}_6$ )  $\delta$  0.33 (s, 27H,  $\text{C}(\text{SiMe}_3)_3$ ), 0.37 (s, 27H,  $\text{C}(\text{SiMe}_3)_3$ ), 0.38 (s, 72H,  $\text{CH}(\text{SiMe}_3)_2$ ), 2.64 (s, 4H,  $\text{CHSi}$ ), 6.12–6.19 (m, 2H,  $\text{CH}=\text{CH}$ ), 6.64–6.71 (m, 2H,  $\text{CH}=\text{CH}$ ), 6.97 (s, 4H,  $\text{ArH}$ );  $^{13}\text{C}$  NMR (75 MHz,  $\text{C}_6\text{D}_6$ )  $\delta$  2.2, 2.6 ( $\text{CH}(\text{SiMe}_3)_2$ ), 5.8 ( $\text{C}(\text{SiMe}_3)_3$ ), 22.8 ( $\text{C}(\text{SiMe}_3)_3$ ), 29.8 ( $\text{CH}_2$ ), 127.4 ( $\text{ArC}(3,5)$ ), 128.8 ( $\text{ArC}(1)$ ), 135.9 ( $\text{CH}=\text{CH}$ ), 142.6 ( $\text{CH}=\text{CH}$ ), 148.9 ( $\text{ArC}(4)$ ), 151.8 ( $\text{ArC}(2,6)$ );  $^{29}\text{Si}$  NMR (59 MHz,  $\text{C}_6\text{D}_6$ )  $\delta$  -10.1 ( $\text{SiO}$ ), 1.1 ( $\text{C}(\text{SiMe}_3)_3$ ), 2.0, 2.7 ( $\text{CH}(\text{SiMe}_3)_2$ ); HRMS (FAB,  $\text{M}^+$ ,  $m/z$ ) Calcd for  $\text{C}_{64}\text{H}_{138}\text{O}_2\text{Si}_{16}$  1386.7000, obsd: 1386.7007.

**X-ray crystallographic analyses of 2 and 6.** The intensity data were collected on a Rigaku/MSM Mercury CCD diffractometer with graphite monochromated  $\text{MoK}\alpha$  radiation ( $\lambda = 0.71070 \text{ \AA}$ ). Single crystals suitable for X-ray analysis were obtained by cooling down the concentrated solutions (toluene solution for **2**; toluene and hexane mixed solution for **6**). A single crystal suitable for X-ray analysis was mounted on a glass fiber. In the case of air-sensitive compound, mounting was made in a glove-box (Ar). The structures were solved by a direct method ( $\text{SIR-97}^{\text{S3}}$ ) and refined by full-matrix least-squares procedures on  $F^2$  for all reflections ( $\text{SHELXL-97}^{\text{S4}}$ ). All hydrogen atoms were placed using AFIX instructions, while all other atoms were refined anisotropically.

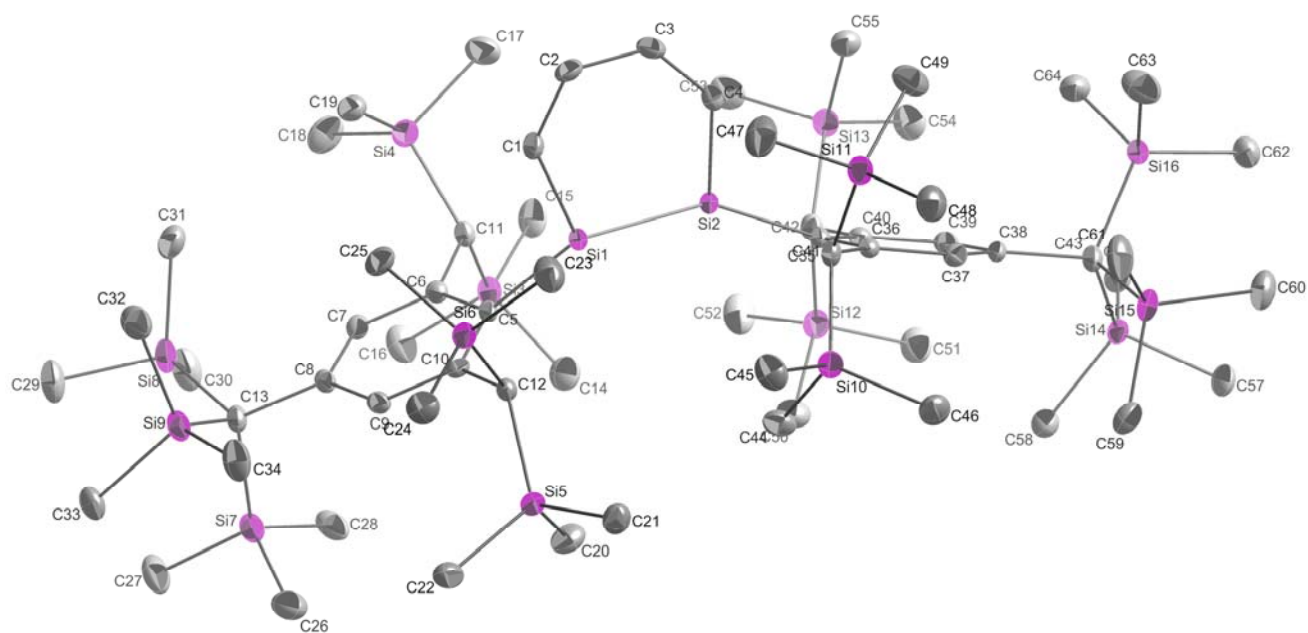

**Figure S-2.** Thermal ellipsoid (50%) drawing of  $[2 \cdot 0.5(C_7H_8)]$ . Hydrogen atoms and solvate are omitted for clarity. Tris(trimethylsilyl)methyl group attached to C(38) is disordered, and one of them is shown.

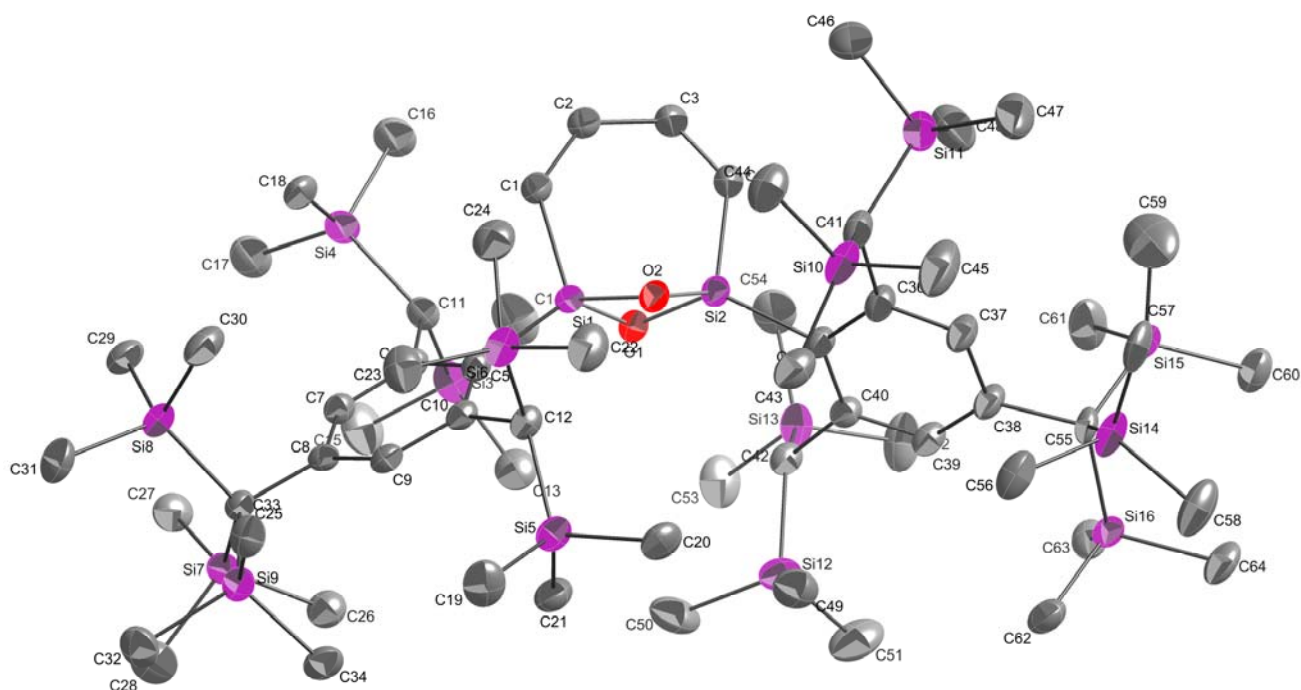

**Figure S-3.** Thermal ellipsoid (50%) drawing of  $[6 \cdot C_7H_8 \cdot C_6H_{14}]$ . Hydrogen atoms and solvates are omitted for clarity. Tris(trimethylsilyl)methyl group attached to C(38) is disordered, and one of them is shown.

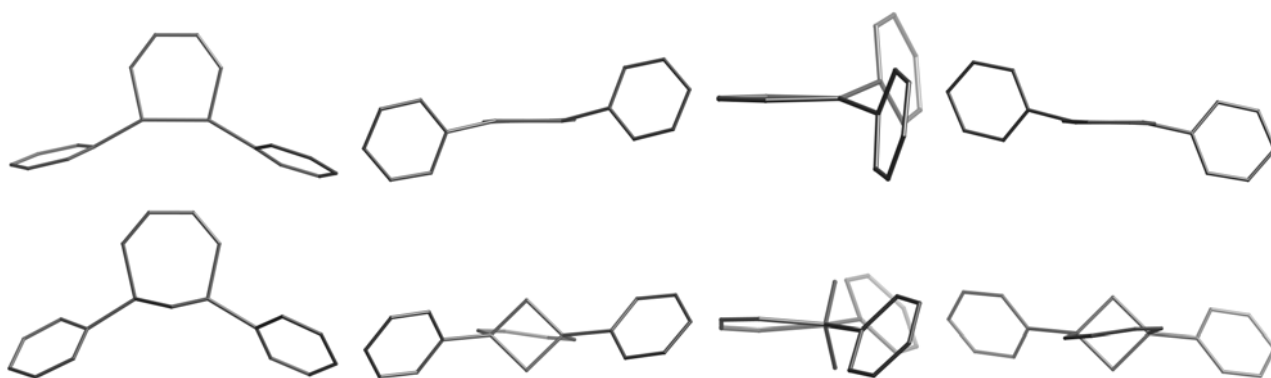

**Figure S-4.** Stick plots of **2** (top) and **6** (bottom) for geometrical comparison between the two compounds. Only skeletal structures were drawn for clarity.



**Table S-1.** Crystal data and structure refinement for [2·0.5(C<sub>7</sub>H<sub>8</sub>)].

|                                                     |                                                                  |                           |
|-----------------------------------------------------|------------------------------------------------------------------|---------------------------|
| Empirical formula                                   | C <sub>67.50</sub> H <sub>142</sub> Si <sub>16</sub>             |                           |
| Formula weight                                      | 1403.25                                                          |                           |
| Temperature                                         | 103(2) K                                                         |                           |
| Wavelength                                          | 0.71075 Å                                                        |                           |
| Crystal system                                      | monoclinic                                                       |                           |
| Space group                                         | <i>P</i> 2 <sub>1</sub> / <i>c</i> (#14)                         |                           |
| Unit cell dimensions                                | <i>a</i> = 18.524(2) Å                                           | <i>α</i> = 90°.           |
|                                                     | <i>b</i> = 12.0037(14) Å                                         | <i>β</i> = 101.5916(14)°. |
|                                                     | <i>c</i> = 40.568(5) Å                                           | <i>γ</i> = 90°.           |
| Volume                                              | 8836.5(19) Å <sup>3</sup>                                        |                           |
| <i>Z</i>                                            | 4                                                                |                           |
| Density (calculated)                                | 1.055 Mg/m <sup>3</sup>                                          |                           |
| Absorption coefficient                              | 0.264 mm <sup>-1</sup>                                           |                           |
| <i>F</i> (000)                                      | 3084                                                             |                           |
| Crystal size                                        | 0.20 × 0.20 × 0.10 mm <sup>3</sup>                               |                           |
| <i>θ</i> range for data collection                  | 2.84 to 25.00°.                                                  |                           |
| Index ranges                                        | -22 ≤ <i>h</i> ≤ 22, -14 ≤ <i>k</i> ≤ 14, -47 ≤ <i>l</i> ≤ 48    |                           |
| Reflections collected                               | 80148                                                            |                           |
| Independent reflections                             | 15370 [ <i>R</i> (int) = 0.0709]                                 |                           |
| Completeness to <i>θ</i> = 25.00°                   | 98.8 %                                                           |                           |
| Max. and min. transmission                          | 0.9741 and 0.9492                                                |                           |
| Refinement method                                   | Full-matrix least-squares on <i>F</i> <sup>2</sup>               |                           |
| Data / restraints / parameters                      | 15370 / 0 / 879                                                  |                           |
| Goodness-of-fit on <i>F</i> <sup>2</sup>            | 1.057                                                            |                           |
| Final <i>R</i> indices [ <i>I</i> > 2σ( <i>I</i> )] | <i>R</i> <sub>1</sub> = 0.0441, w <i>R</i> <sub>2</sub> = 0.1243 |                           |
| <i>R</i> indices (all data)                         | <i>R</i> <sub>1</sub> = 0.0492, w <i>R</i> <sub>2</sub> = 0.1284 |                           |
| Largest diff. peak and hole                         | 1.134 and -0.389 e.Å <sup>-3</sup>                               |                           |

**Table S-2.** Crystal data and structure refinement for [6·C<sub>7</sub>H<sub>8</sub>·C<sub>6</sub>H<sub>14</sub>].

|                                                     |                                                                  |                           |
|-----------------------------------------------------|------------------------------------------------------------------|---------------------------|
| Empirical formula                                   | C <sub>77</sub> H <sub>160</sub> O <sub>2</sub> Si <sub>16</sub> |                           |
| Formula weight                                      | 1567.49                                                          |                           |
| Temperature                                         | 103(2) K                                                         |                           |
| Wavelength                                          | 0.71075 Å                                                        |                           |
| Crystal system                                      | triclinic                                                        |                           |
| Space group                                         | <i>P</i> $\bar{1}$ (#2)                                          |                           |
| Unit cell dimensions                                | <i>a</i> = 16.8221(2) Å                                          | $\alpha$ = 92.6933(4)°.   |
|                                                     | <i>b</i> = 17.7685(2) Å                                          | $\beta$ = 111.9361(5)°.   |
|                                                     | <i>c</i> = 18.7611(2) Å                                          | $\gamma$ = 107.5178(12)°. |
| Volume                                              | 4879.28(10) Å <sup>3</sup>                                       |                           |
| <i>Z</i>                                            | 2                                                                |                           |
| Density (calculated)                                | 1.067 Mg/m <sup>3</sup>                                          |                           |
| Absorption coefficient                              | 0.246 mm <sup>-1</sup>                                           |                           |
| <i>F</i> (000)                                      | 1724                                                             |                           |
| Crystal size                                        | 0.10 × 0.05 × 0.02 mm <sup>3</sup>                               |                           |
| $\theta$ range for data collection                  | 2.78 to 25.00°.                                                  |                           |
| Index ranges                                        | -19 ≤ <i>h</i> ≤ 19, -21 ≤ <i>k</i> ≤ 19, -22 ≤ <i>l</i> ≤ 22    |                           |
| Reflections collected                               | 40744                                                            |                           |
| Independent reflections                             | 16924 [ <i>R</i> (int) = 0.0296]                                 |                           |
| Completeness to $\theta$ = 25.00°                   | 98.5 %                                                           |                           |
| Max. and min. transmission                          | 0.9951 and 0.9758                                                |                           |
| Refinement method                                   | Full-matrix least-squares on <i>F</i> <sup>2</sup>               |                           |
| Data / restraints / parameters                      | 16924 / 108 / 1119                                               |                           |
| Goodness-of-fit on <i>F</i> <sup>2</sup>            | 1.039                                                            |                           |
| Final <i>R</i> indices [ <i>I</i> > 2σ( <i>I</i> )] | <i>R</i> <sub>1</sub> = 0.0452, w <i>R</i> <sub>2</sub> = 0.1196 |                           |
| <i>R</i> indices (all data)                         | <i>R</i> <sub>1</sub> = 0.0496, w <i>R</i> <sub>2</sub> = 0.1244 |                           |
| Largest diff. peak and hole                         | 0.498 and -0.543 e.Å <sup>-3</sup>                               |                           |

## References

- (S1) A. B. Pangborn, M. A. Giardello, R. H. Grubbs, R. K. Rosen and F. J. Timmers, *Organometallics*, 1996, **15**, 1518.
- (S2) T. Sasamori, J. S. Han, K. Hironaka, N. Takagi, S. Nagase and N. Tokitoh, *Pure Appl. Chem.*, 2010, **82**, 603-612.
- (S3) A. Altomare, M. Burla, M. Camalli, G. Cascarano, C. Giacovazzo, A. Guagliardi, A. Moliterni, G. Polidori and R. Spagna, *J. Appl. Cryst.*, 1999, **32**, 115.
- (S4) (a) G. M. Sheldrick, *Acta Crystallogr. Sect. A* 1990, **46**, 467. (b) G. Sheldrick, SHELX-97 Program for Crystal Structure Solution and the Refinement of Crystal Structures, Institut für Anorganische Chemie der Universität Göttingen, Tammanstrasse 4, D-3400 Göttingen, Germany, 1997.

|                               |                                |                |       |                        |                          |                   |                          |
|-------------------------------|--------------------------------|----------------|-------|------------------------|--------------------------|-------------------|--------------------------|
| <b>Acquisition Time (sec)</b> | 5.5052                         | <b>Comment</b> | C6D6  | <b>Date</b>            | Tue Nov 03 15:05:27 2009 | <b>Date Stamp</b> | Tue Nov 03 15:05:27 2009 |
| <b>File Name</b>              | D:\HJ\SKYOTO-U\NMR\091103-1.DX |                |       | <b>Frequency (MHz)</b> | 297.78                   | <b>Nucleus</b>    | <sup>1</sup> H           |
| <b>Original Points Count</b>  | 32768                          | <b>Owner</b>   | GUEST | <b>Points Count</b>    | 32768                    | <b>Solvent</b>    | BENZENE-D6               |
| <b>Sweep Width (Hz)</b>       | 5952.20                        |                |       |                        |                          |                   |                          |

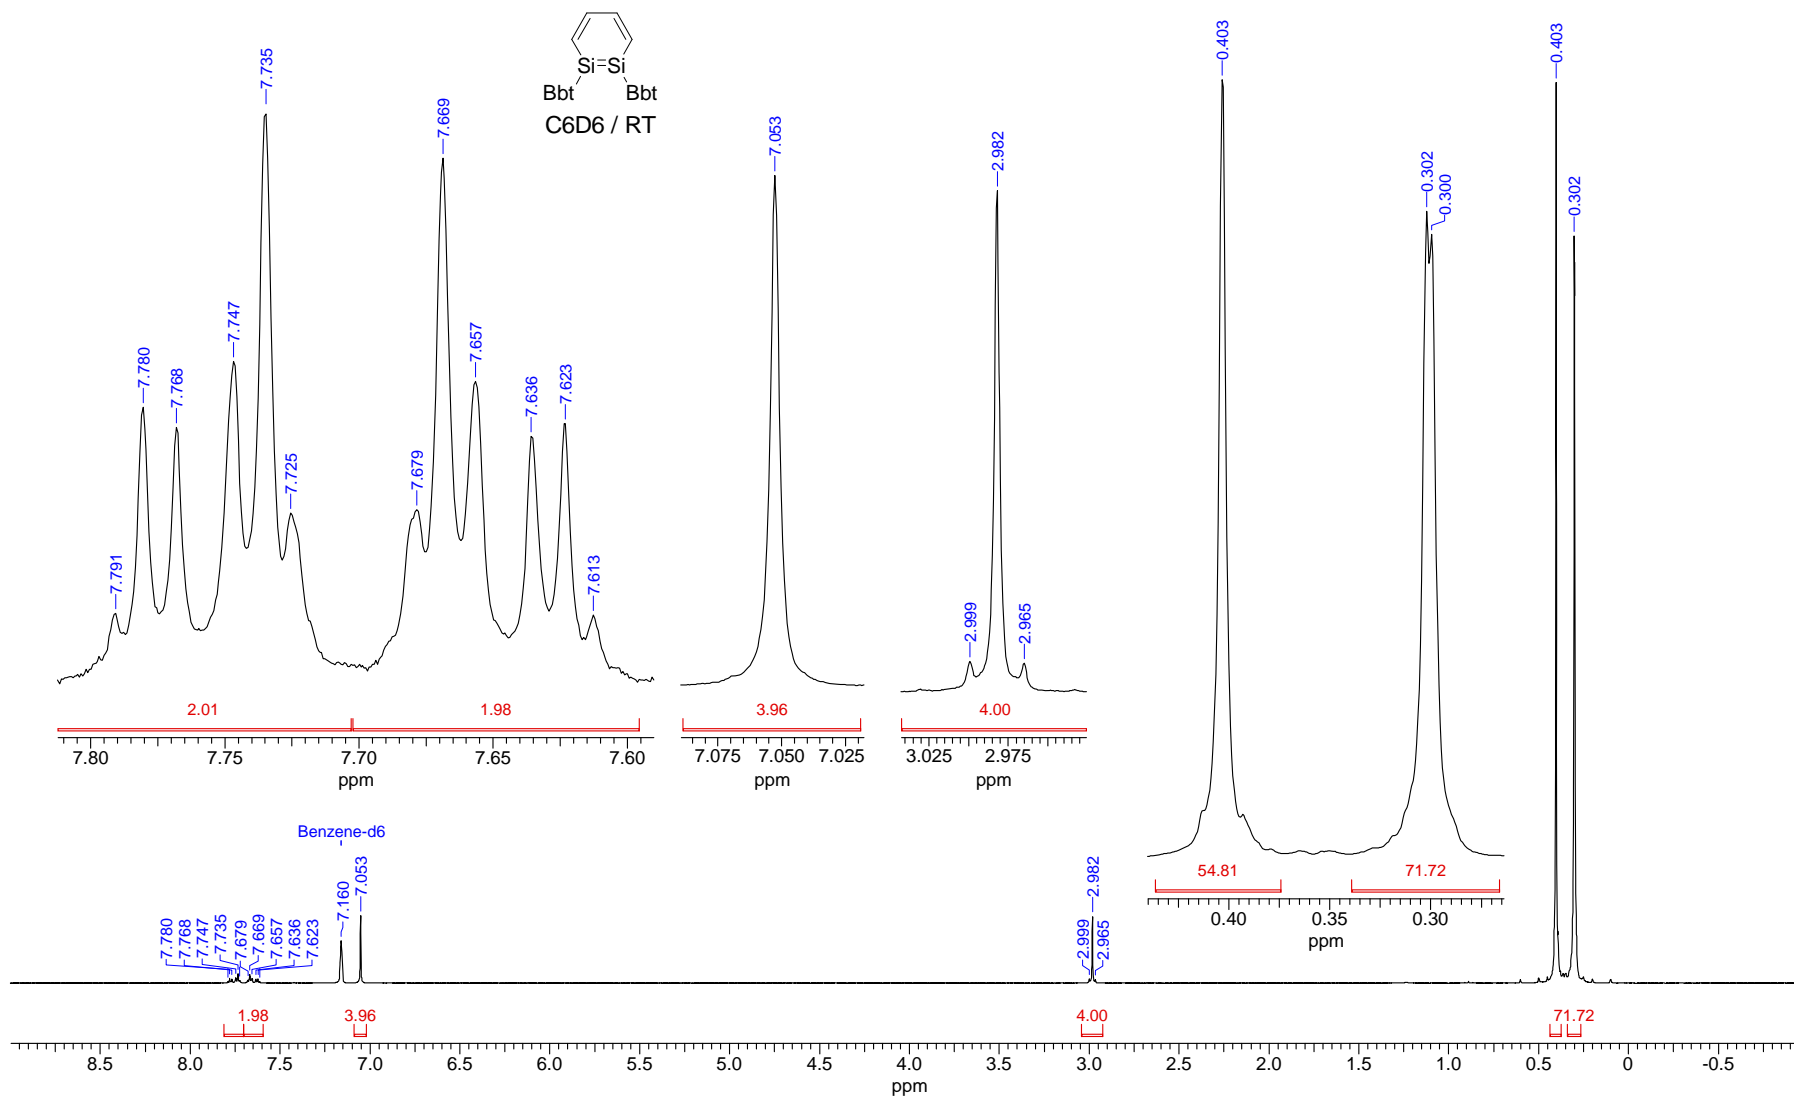

**Fig. S-5.** <sup>1</sup>H NMR spectrum of **2**.

|                               |                                   |                |       |                        |                          |                   |                          |
|-------------------------------|-----------------------------------|----------------|-------|------------------------|--------------------------|-------------------|--------------------------|
| <b>Acquisition Time (sec)</b> | 1.6221                            | <b>Comment</b> | C6D6  | <b>Date</b>            | Wed Nov 04 10:18:05 2009 | <b>Date Stamp</b> | Wed Nov 04 10:18:05 2009 |
| <b>File Name</b>              | D:\HJS\KYOTO-U\NMR\091103-2-C2.DX | <b>Owner</b>   | GUEST | <b>Frequency (MHz)</b> | 74.88                    | <b>Nucleus</b>    | 13C                      |
| <b>Original Points Count</b>  | 32768                             |                |       | <b>Points Count</b>    | 32768                    | <b>Solvent</b>    | BENZENE-D6               |
| <b>Sweep Width (Hz)</b>       | 20201.40                          |                |       |                        |                          |                   |                          |

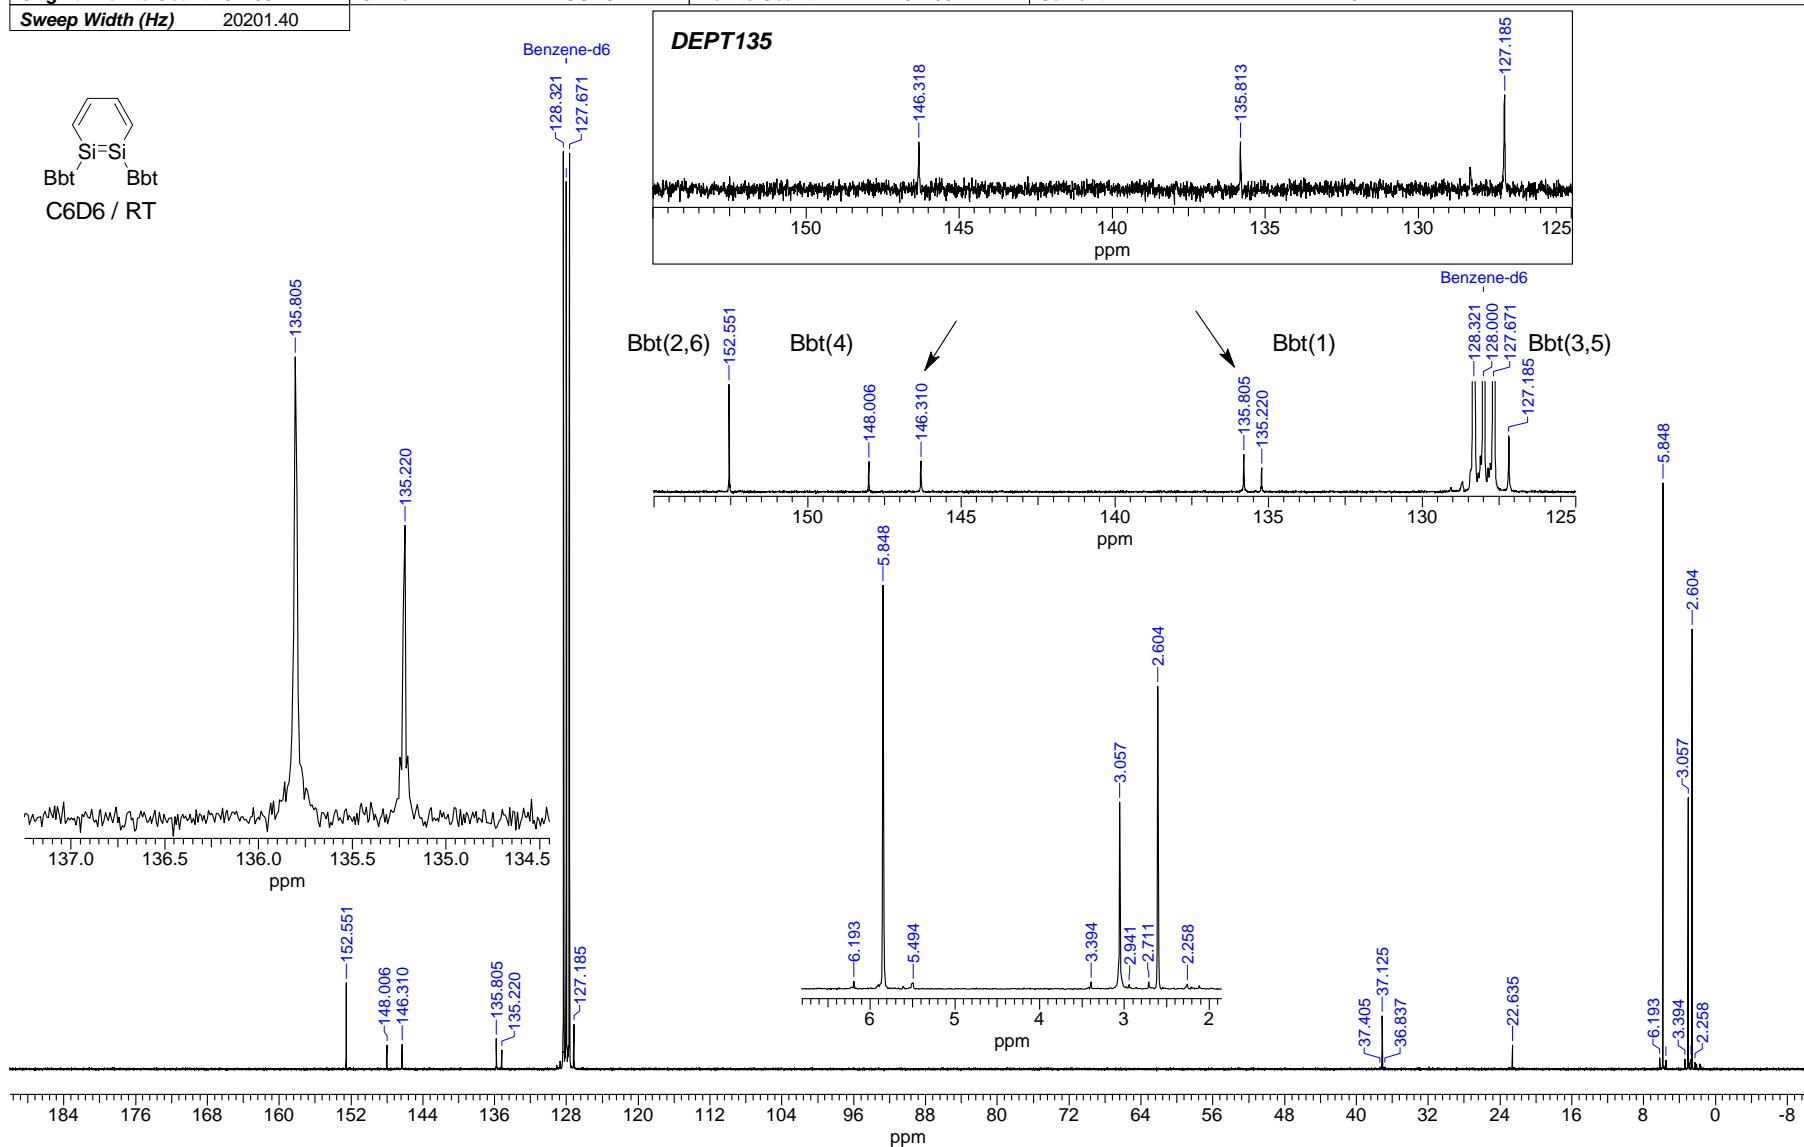

**Fig. S-6.**  $^{13}\text{C}\{^1\text{H}\}$  and  $^{13}\text{C}$  DEPT135 NMR spectra of **2**.

|                                                          |                          |                                      |                                            |
|----------------------------------------------------------|--------------------------|--------------------------------------|--------------------------------------------|
| <b>Acquisition Time (sec)</b> 0.8192                     | <b>Comment</b> 5ms, 10ms | <b>Date</b> Fri Oct 16 15:41:43 2009 | <b>Date Stamp</b> Fri Oct 16 15:41:43 2009 |
| <b>File Name</b> D:\HJS\KYOTO-U\NMR\091016-1-0510-128.DX |                          | <b>Frequency (MHz)</b> 59.16         | <b>Nucleus</b> 29Si                        |
| <b>Original Points Count</b> 32768                       | <b>Owner</b> GUEST       | <b>Points Count</b> 32768            | <b>Sweep Width (Hz)</b> 39998.78           |
|                                                          |                          |                                      | <b>Origin</b> JEOL                         |

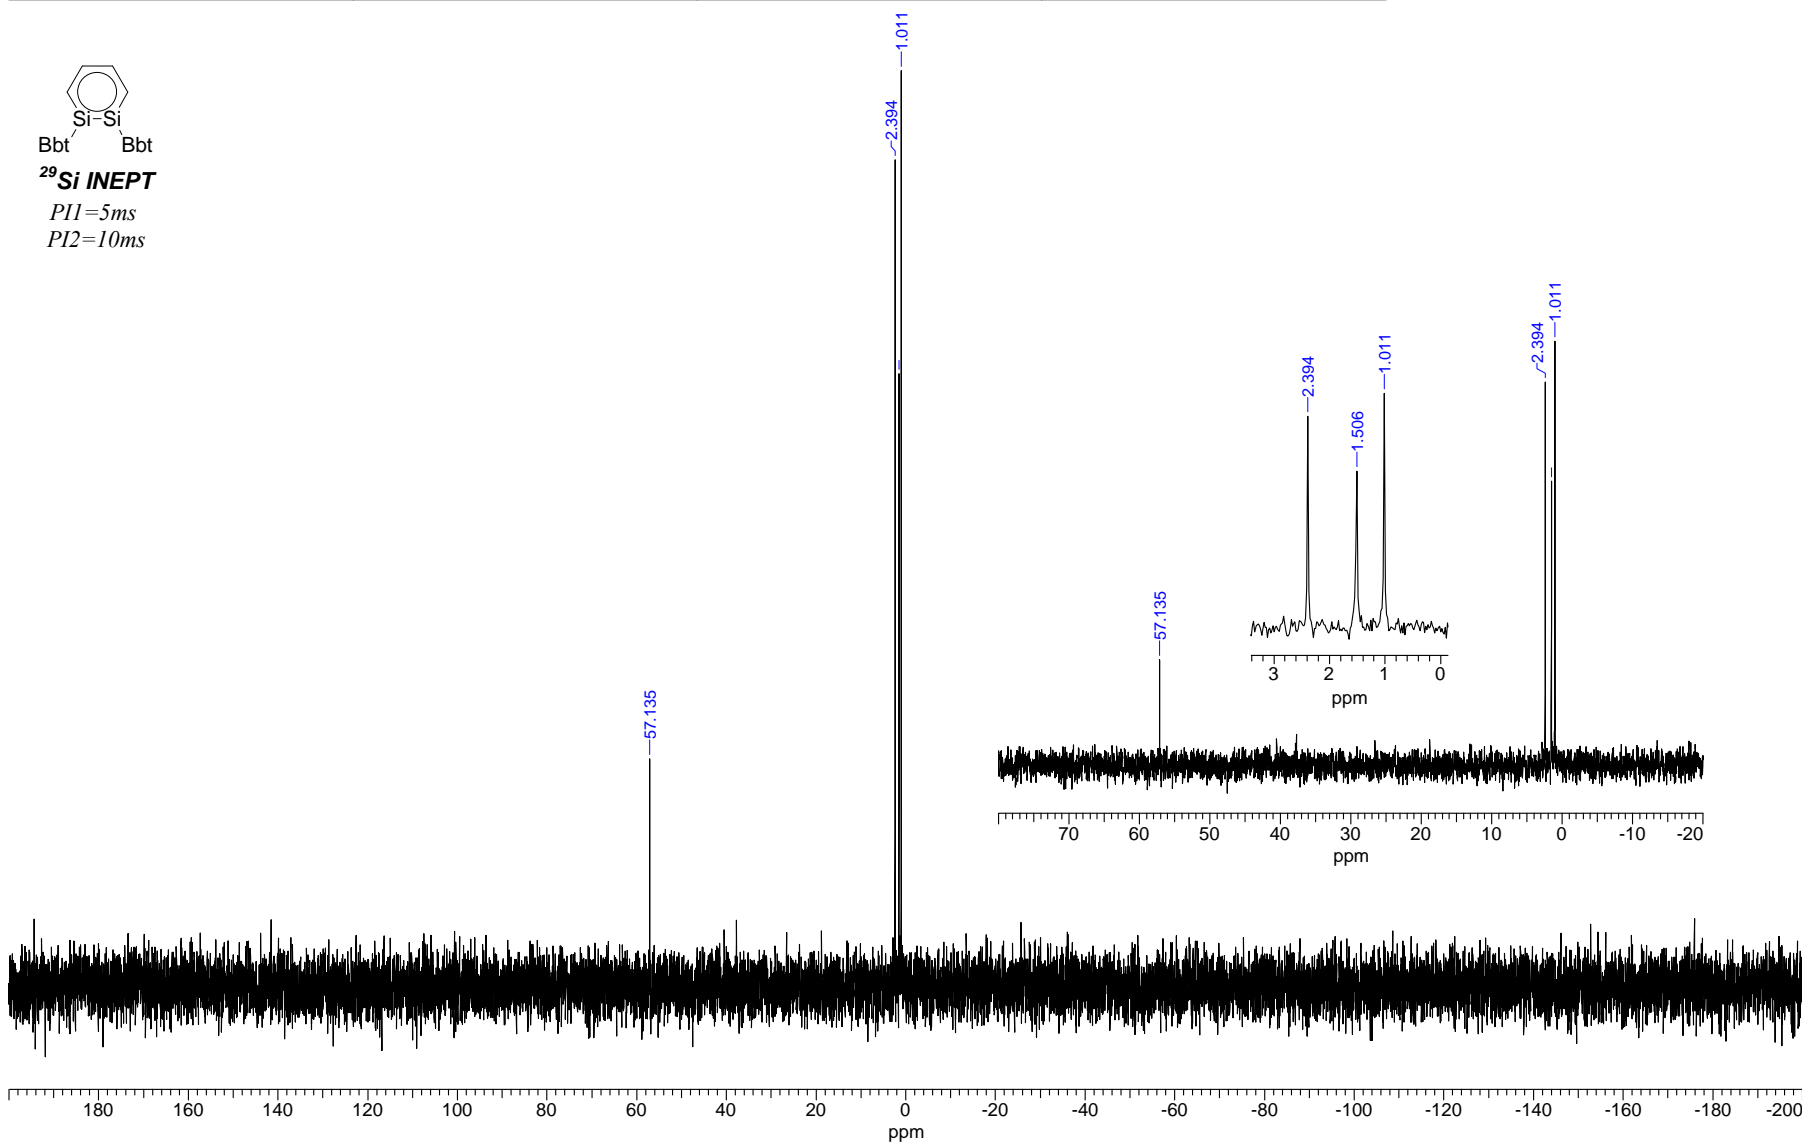

**Fig. S-7.** <sup>29</sup>Si INEPT NMR spectrum of **2**.

|                        |                      |                     |                         |                   |                                                 |                       |                     |
|------------------------|----------------------|---------------------|-------------------------|-------------------|-------------------------------------------------|-----------------------|---------------------|
| <b>Origin</b>          | JASCO                | <b>Owner</b>        | icr                     | <b>File Name</b>  | D:\HJS\KYOTO-U\UV\2-068 DISILABENZENE\2.4E4P.DX | <b>Date Stamp</b>     | 09/11/11 21:33:33   |
| <b>Date</b>            | 11 Nov 2009 21:38:20 | <b>Technique</b>    | UV-Visible              | <b>Instrument</b> | JASCO Corp., V-570, Rev. 1.00                   |                       |                     |
| <b>Spectral Region</b> | UV-Vis-NIR           | <b>X Axis</b>       | Wavelength (nanometers) | <b>Y Axis</b>     | Absorbance                                      | <b>Spectrum Range</b> | 220.0000 - 800.0000 |
| <b>Points Count</b>    | 581                  | <b>Data Spacing</b> | 1.0000                  |                   |                                                 |                       |                     |

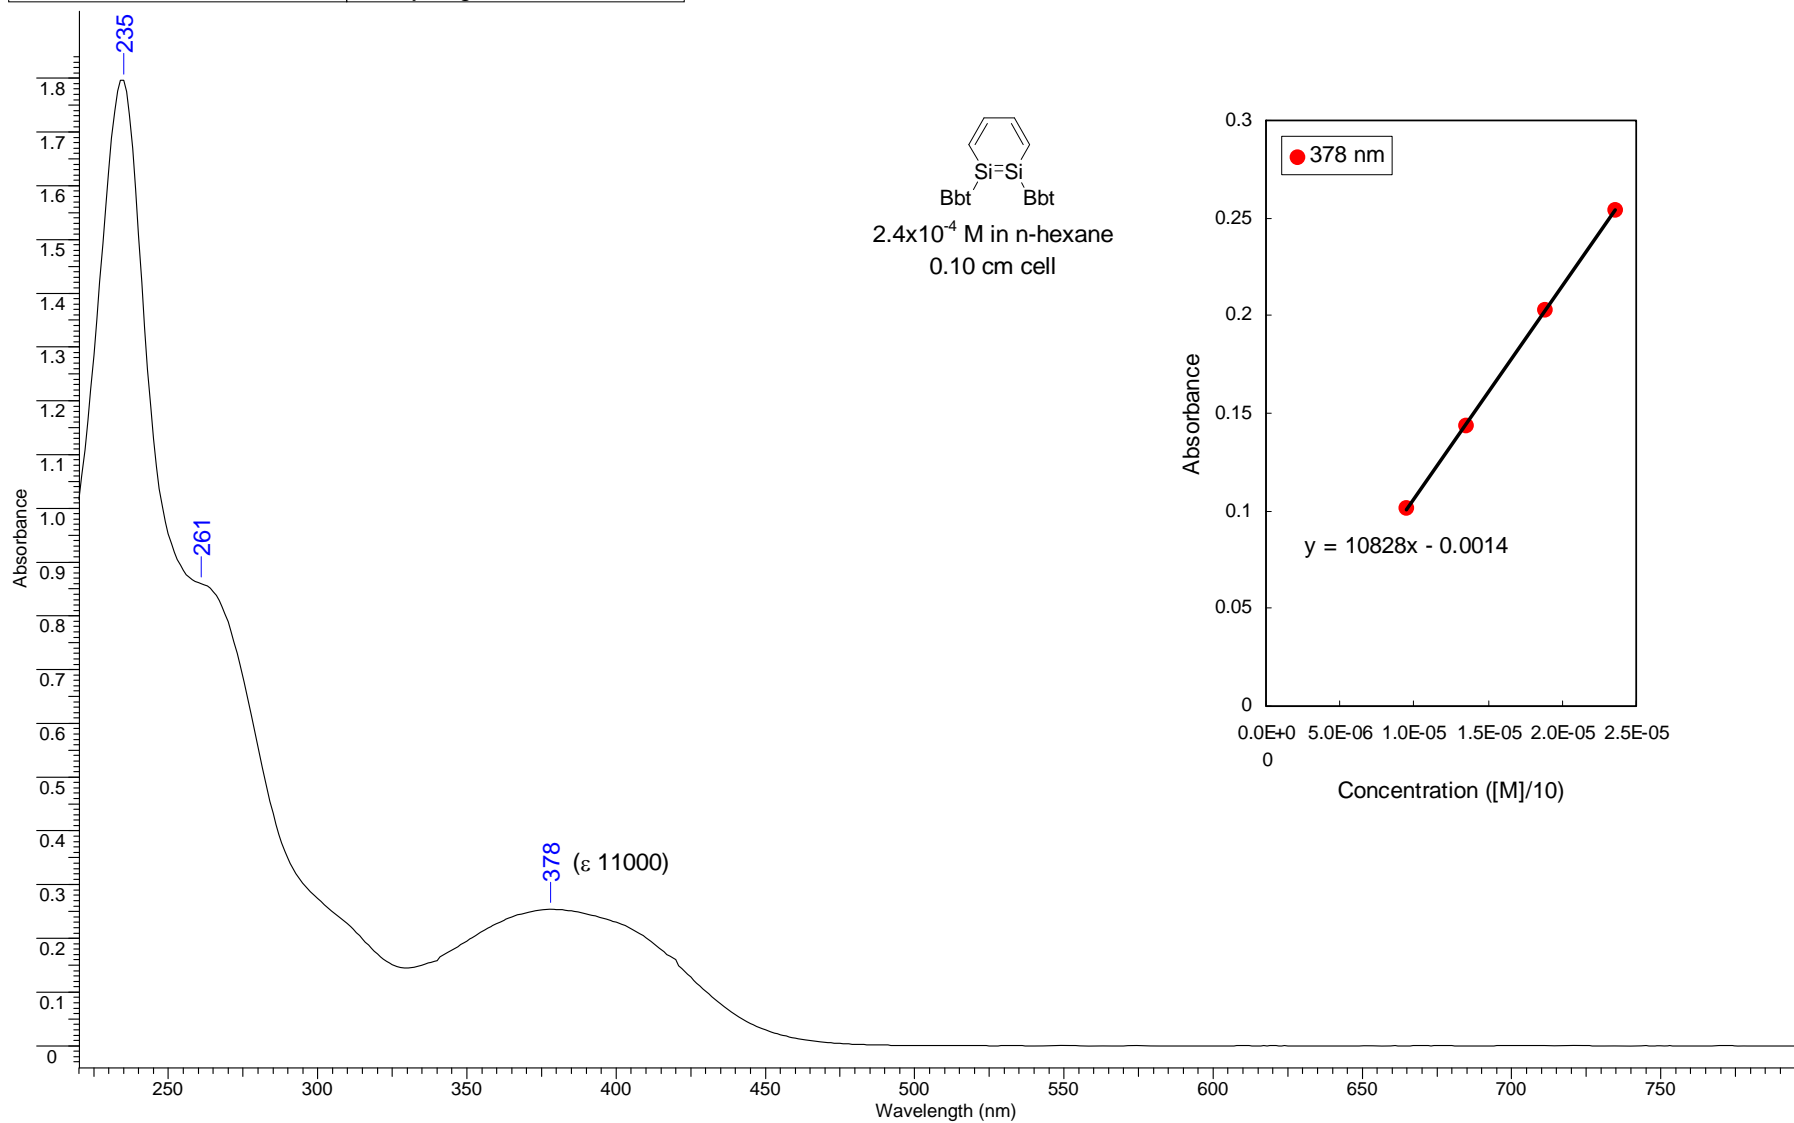

Fig. S-8. UV/Vis spectrum of 2.

|                                                 |                                      |                                            |
|-------------------------------------------------|--------------------------------------|--------------------------------------------|
| <b>Acquisition Time (sec)</b> 5.5052            | <b>Date</b> Fri Nov 20 22:16:51 2009 | <b>Date Stamp</b> Fri Nov 20 22:16:51 2009 |
| <b>File Name</b> D:\HJS\KYOTO-U\NMR\091120-2.DX | <b>Frequency (MHz)</b> 297.78        | <b>Nucleus</b> 1H                          |
| <b>Original Points Count</b> 32768              | <b>Owner</b> GUEST                   | <b>Points Count</b> 32768                  |
|                                                 |                                      | <b>Sweep Width (Hz)</b> 5952.20            |
|                                                 |                                      | <b>Origin</b> JEOL                         |

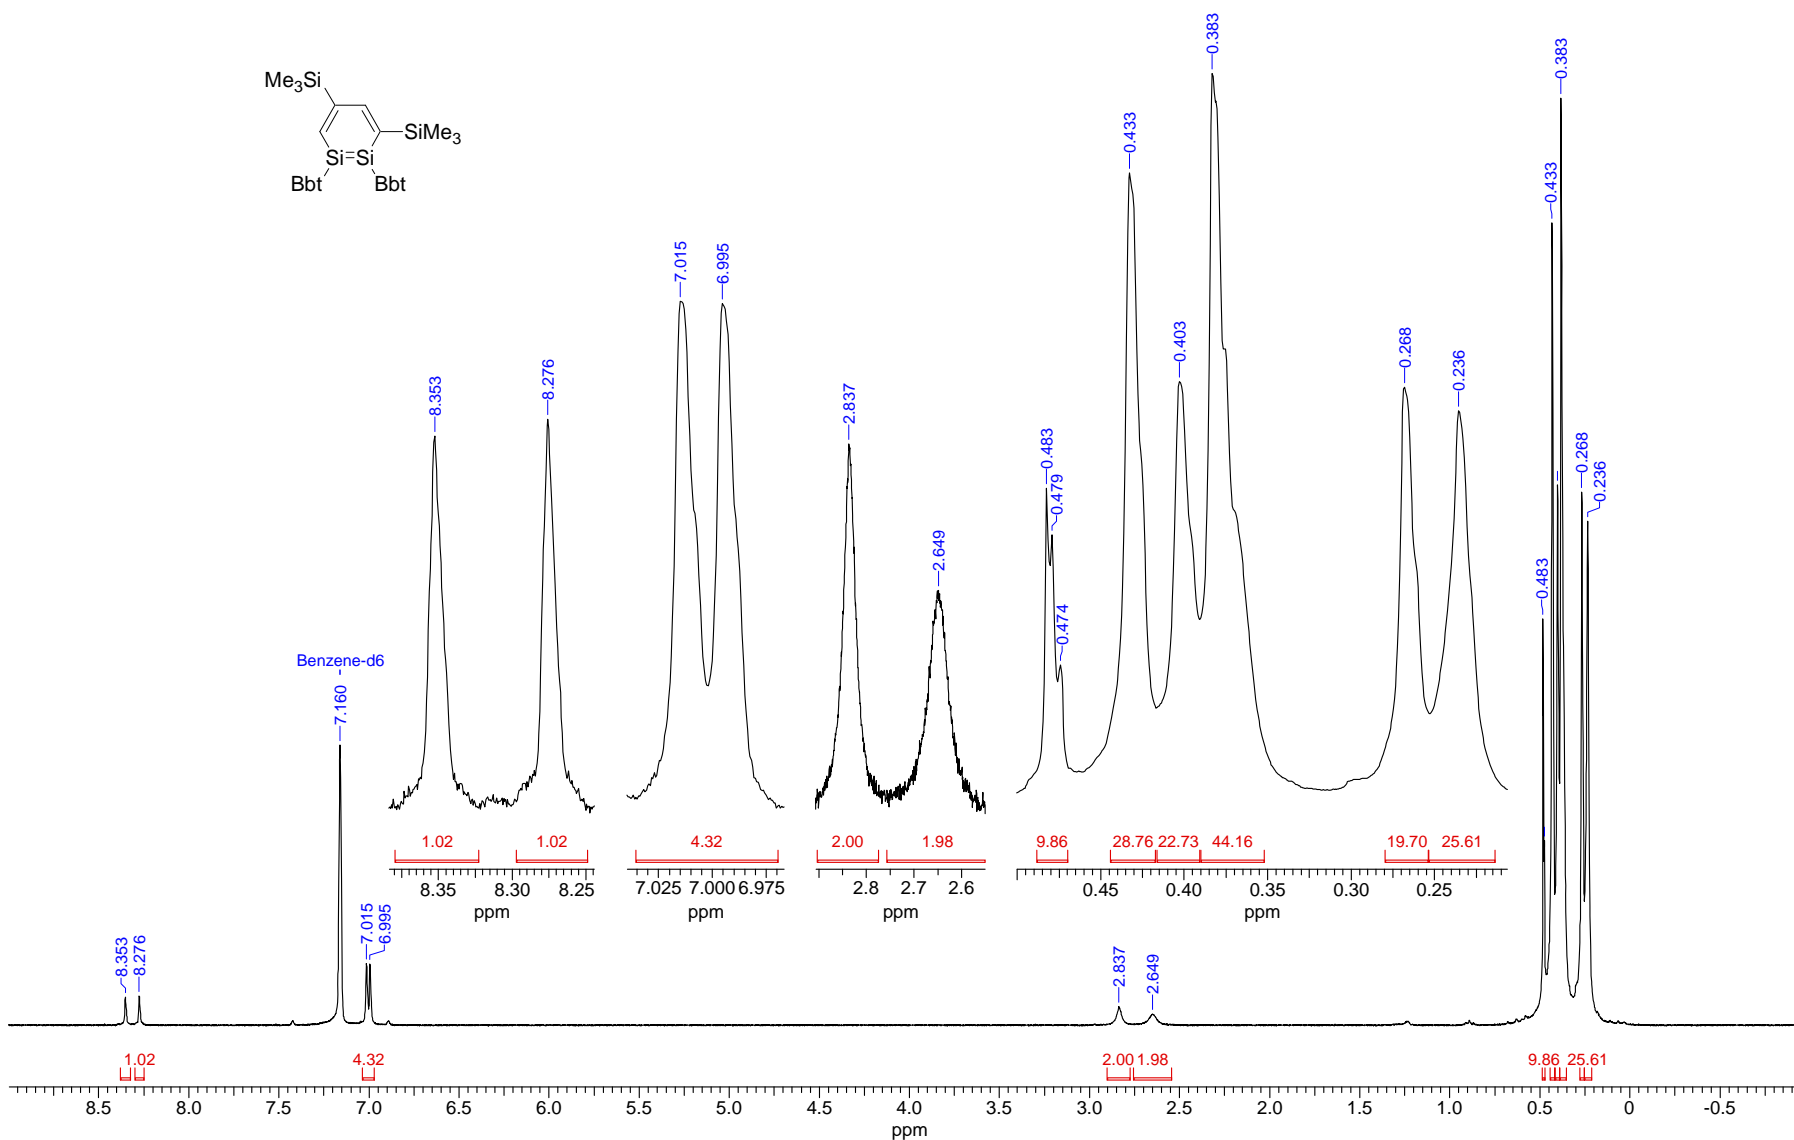

Fig. S-9. <sup>1</sup>H NMR spectrum of **3**.



|                               |                                   |                        |       |                     |                          |                         |                          |
|-------------------------------|-----------------------------------|------------------------|-------|---------------------|--------------------------|-------------------------|--------------------------|
| <b>Acquisition Time (sec)</b> | 1.6221                            | <b>Comment</b>         | auto  | <b>Date</b>         | Sat Nov 21 09:50:28 2009 | <b>Date Stamp</b>       | Sat Nov 21 09:50:28 2009 |
| <b>File Name</b>              | D:\HJ\SIKYOTO-U\NMR\091120-2-C.DX | <b>Frequency (MHz)</b> | 74.88 | <b>Nucleus</b>      | 13C                      | <b>Origin</b>           | JEOL                     |
| <b>Original Points Count</b>  | 32768                             | <b>Owner</b>           | GUEST | <b>Points Count</b> | 32768                    | <b>Sweep Width (Hz)</b> | 20201.40                 |

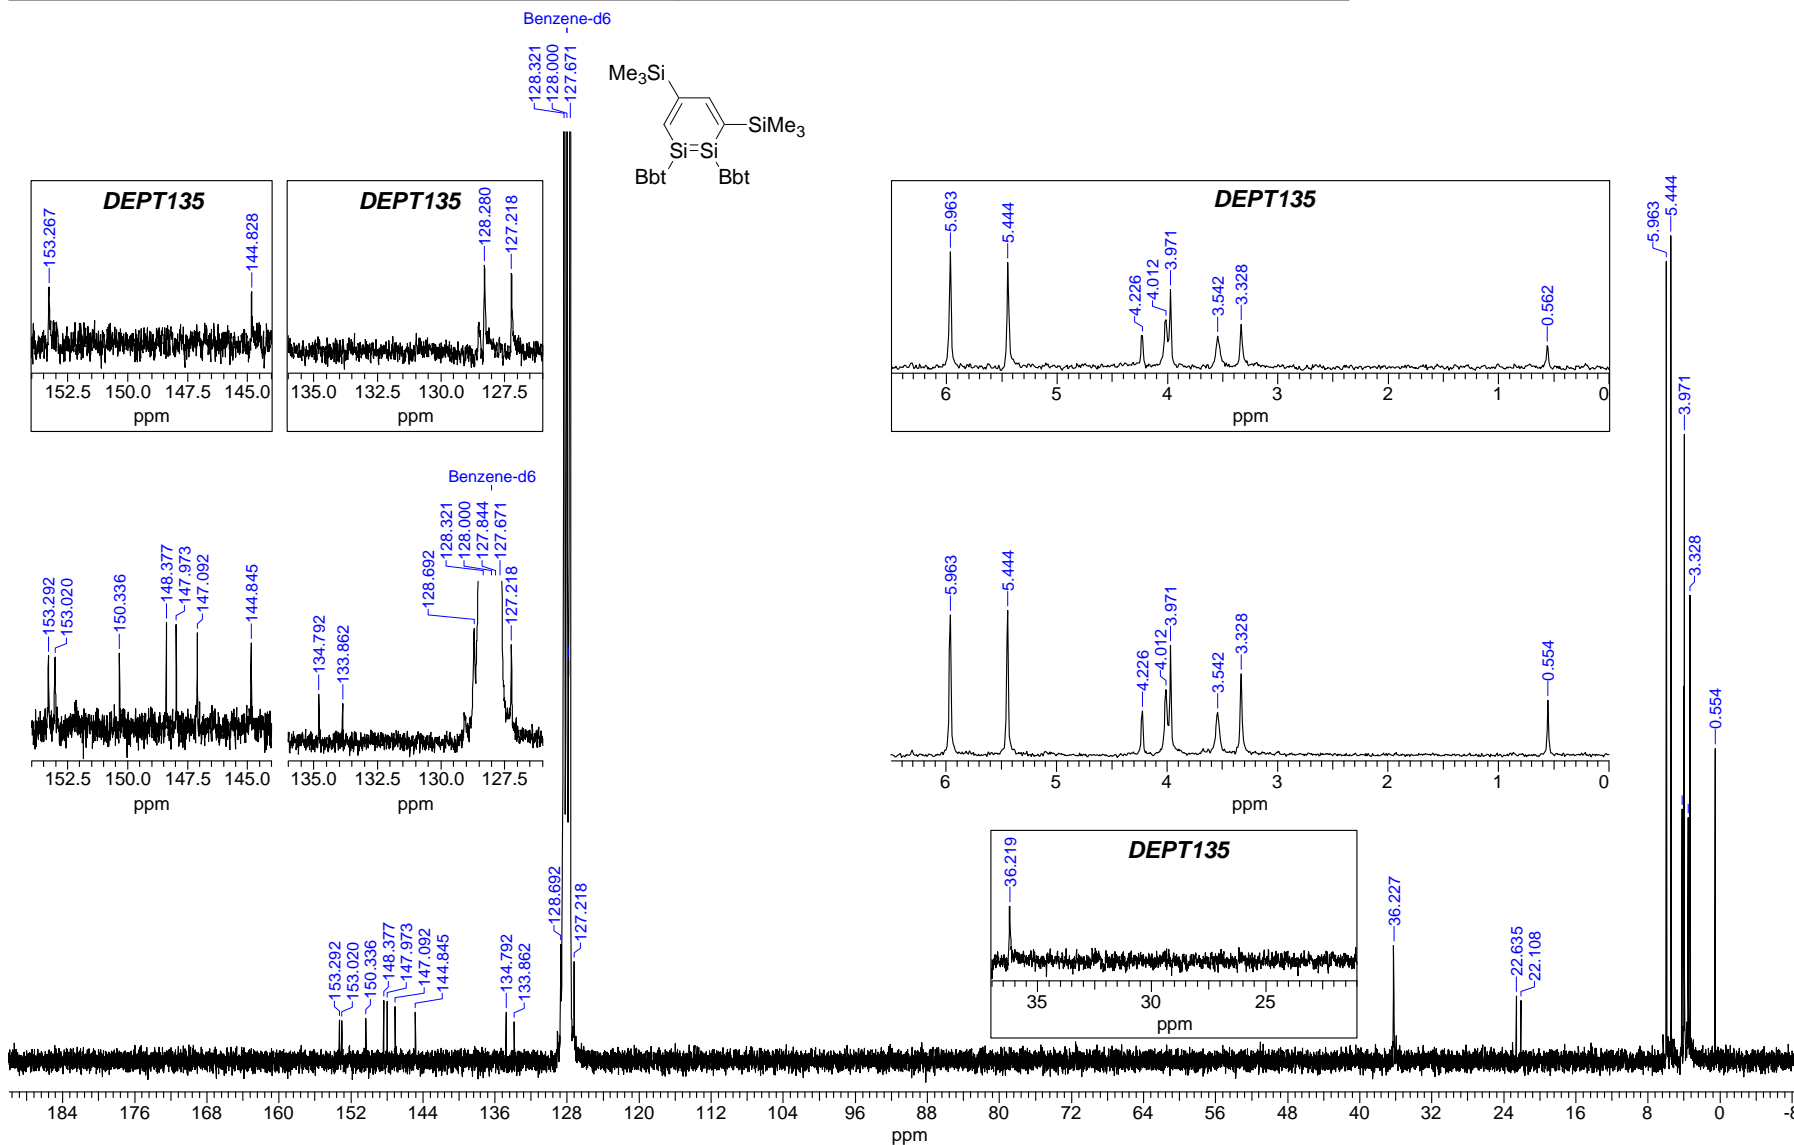

Fig. S-10.  $^{13}\text{C}\{^1\text{H}\}$  and  $^{13}\text{C}$  DEPT135 NMR spectra of **3**.

|                               |                          |                         |                                     |                              |                          |
|-------------------------------|--------------------------|-------------------------|-------------------------------------|------------------------------|--------------------------|
| <b>Acquisition Time (sec)</b> | 0.8192                   | <b>Comment</b>          | C6D6, 40ms 40ms                     | <b>Date</b>                  | Sat Nov 21 12:29:07 2009 |
| <b>Date Stamp</b>             | Sat Nov 21 12:29:07 2009 | <b>File Name</b>        | D:\HJS\KYOTO-U\NMR\091121-1-4040.DX | <b>Frequency (MHz)</b>       | 59.16                    |
| <b>Nucleus</b>                | <sup>29</sup> Si         | <b>Origin</b>           | JEOL                                | <b>Original Points Count</b> | 32768                    |
| <b>Solvent</b>                | BENZENE-D6               | <b>Sweep Width (Hz)</b> | 39998.78                            | <b>Owner</b>                 | GUEST                    |
|                               |                          |                         |                                     | <b>Points Count</b>          | 32768                    |

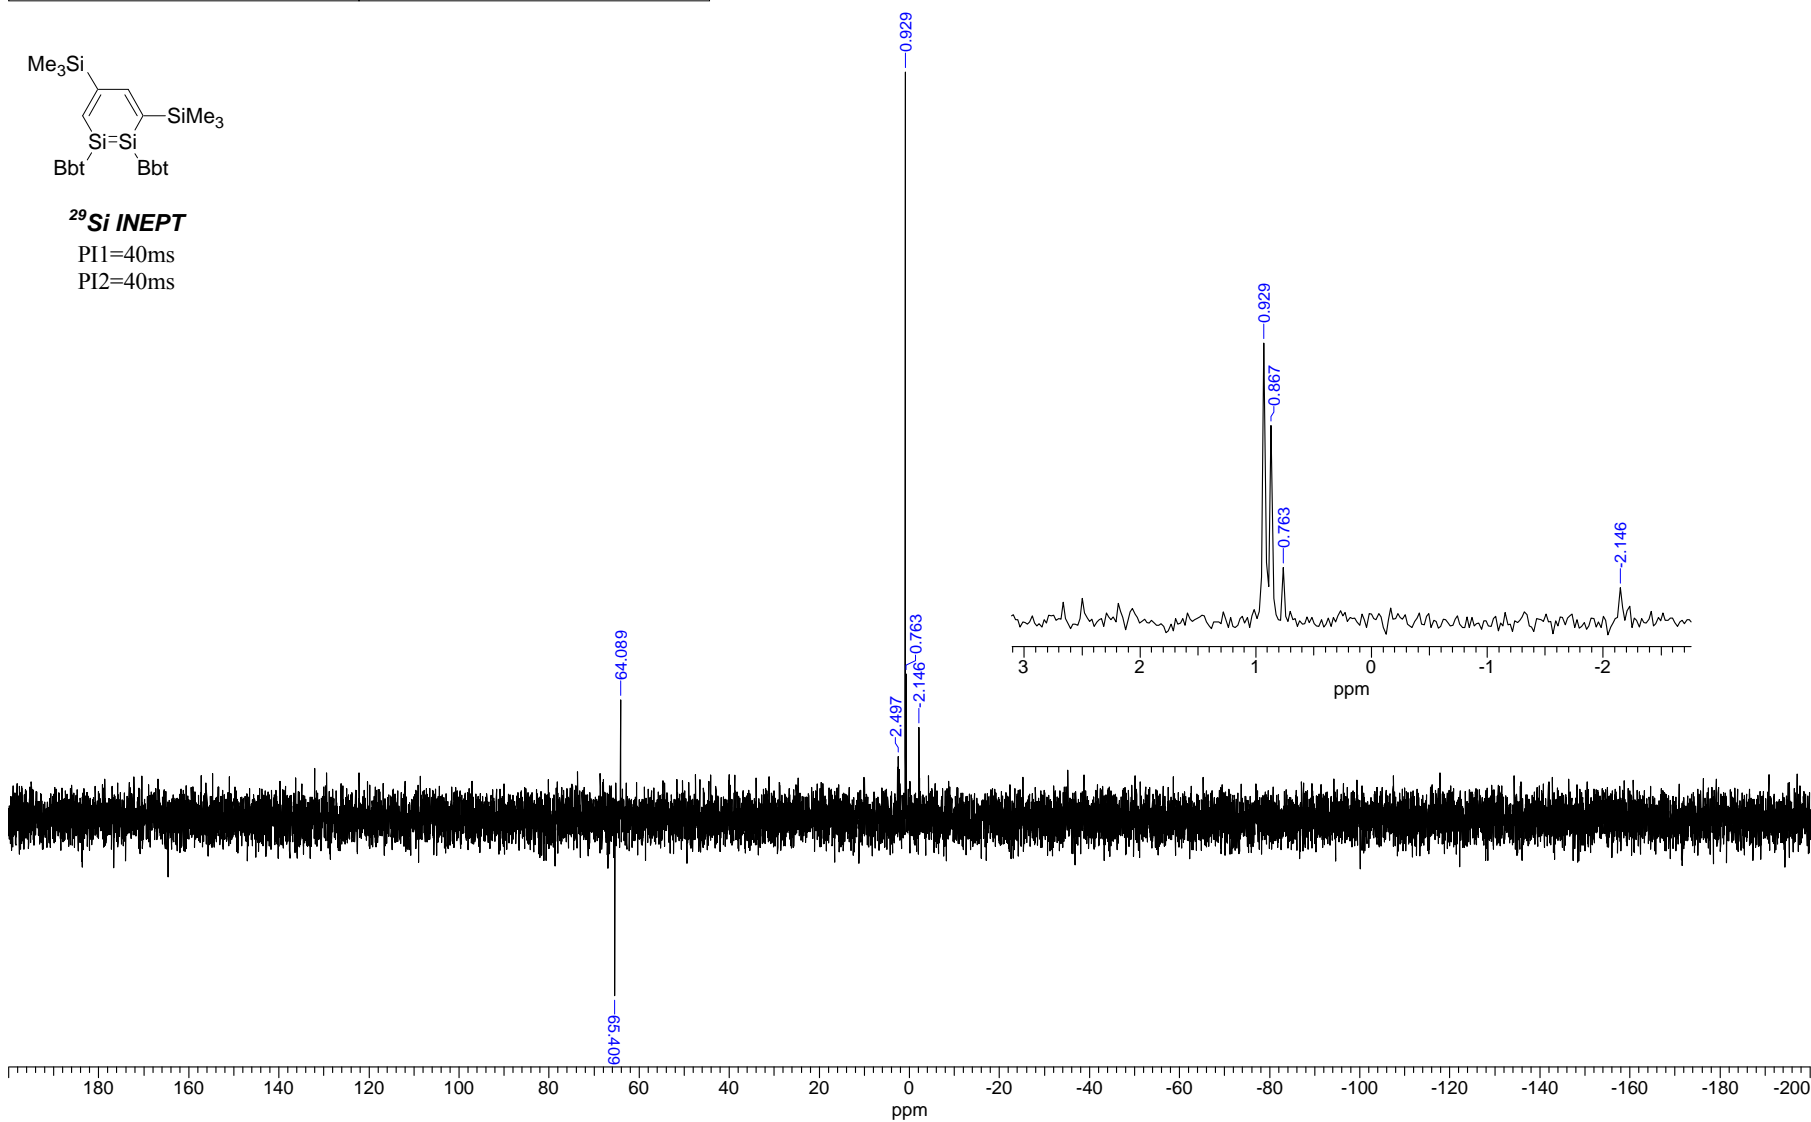

Fig. S-11. <sup>29</sup>Si INEPT NMR spectrum of **3**.

|                               |                          |                         |                                     |                              |                          |
|-------------------------------|--------------------------|-------------------------|-------------------------------------|------------------------------|--------------------------|
| <b>Acquisition Time (sec)</b> | 0.8192                   | <b>Comment</b>          | C6D6, 5ms 10ms                      | <b>Date</b>                  | Sat Nov 21 00:05:17 2009 |
| <b>Date Stamp</b>             | Sat Nov 21 00:05:17 2009 | <b>File Name</b>        | D:\HJS\KYOTO-U\NMR\091120-2-0510.DX | <b>Frequency (MHz)</b>       | 59.16                    |
| <b>Nucleus</b>                | <sup>29</sup> Si         | <b>Origin</b>           | JEOL                                | <b>Original Points Count</b> | 32768                    |
| <b>Solvent</b>                | BENZENE-D6               | <b>Sweep Width (Hz)</b> | 39998.78                            | <b>Owner</b>                 | GUEST                    |
|                               |                          |                         |                                     | <b>Points Count</b>          | 32768                    |

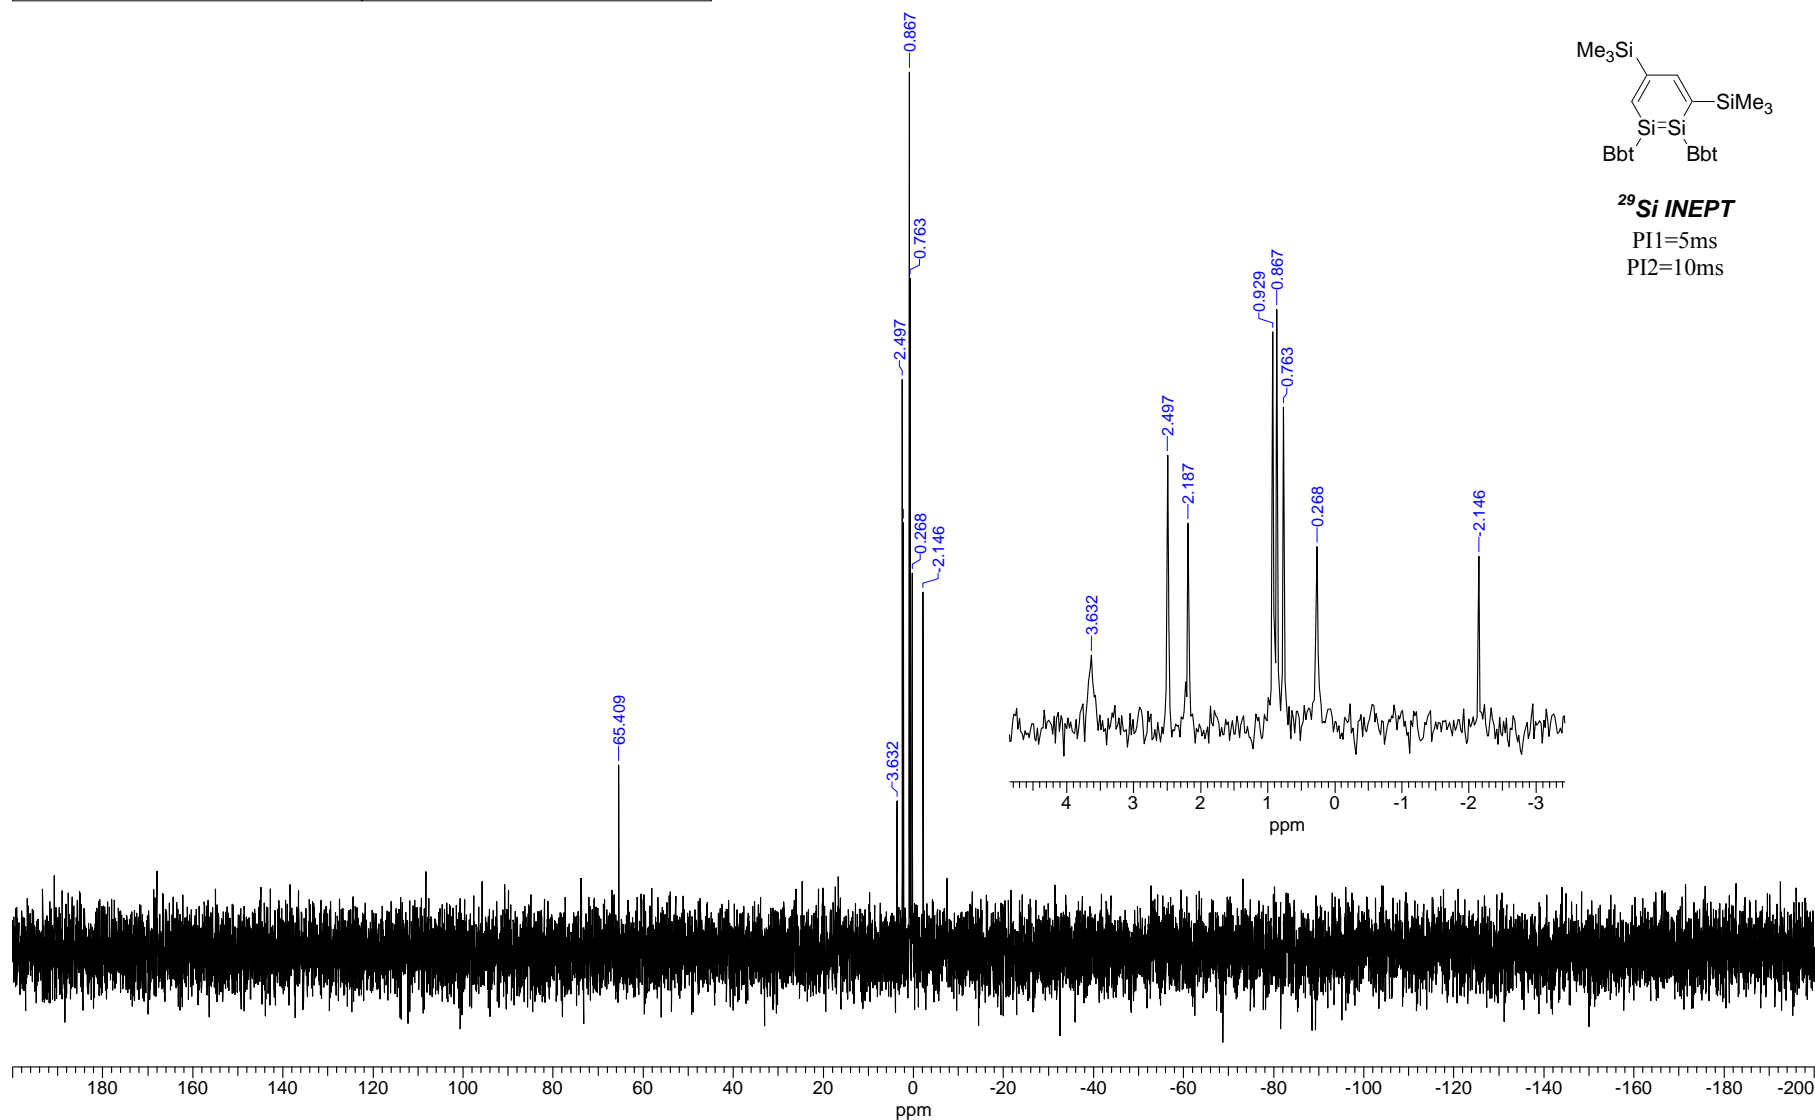

**Fig. S-12.** <sup>29</sup>Si INEPT NMR spectrum of **3**.

|                               |                                |                        |                          |                         |                          |
|-------------------------------|--------------------------------|------------------------|--------------------------|-------------------------|--------------------------|
| <b>Acquisition Time (sec)</b> | 5.5052                         | <b>Date</b>            | Thu Nov 05 17:10:59 2009 | <b>Date Stamp</b>       | Thu Nov 05 17:10:59 2009 |
| <b>File Name</b>              | D:\HJS\KYOTO-U\NMR\091105-1.DX | <b>Frequency (MHz)</b> | 297.78                   | <b>Nucleus</b>          | <sup>1</sup> H           |
| <b>Original Points Count</b>  | 32768                          | <b>Owner</b>           | GUEST                    | <b>Points Count</b>     | 32768                    |
|                               |                                |                        |                          | <b>Sweep Width (Hz)</b> | 5952.20                  |
|                               |                                |                        |                          | <b>Origin</b>           | JEOL                     |

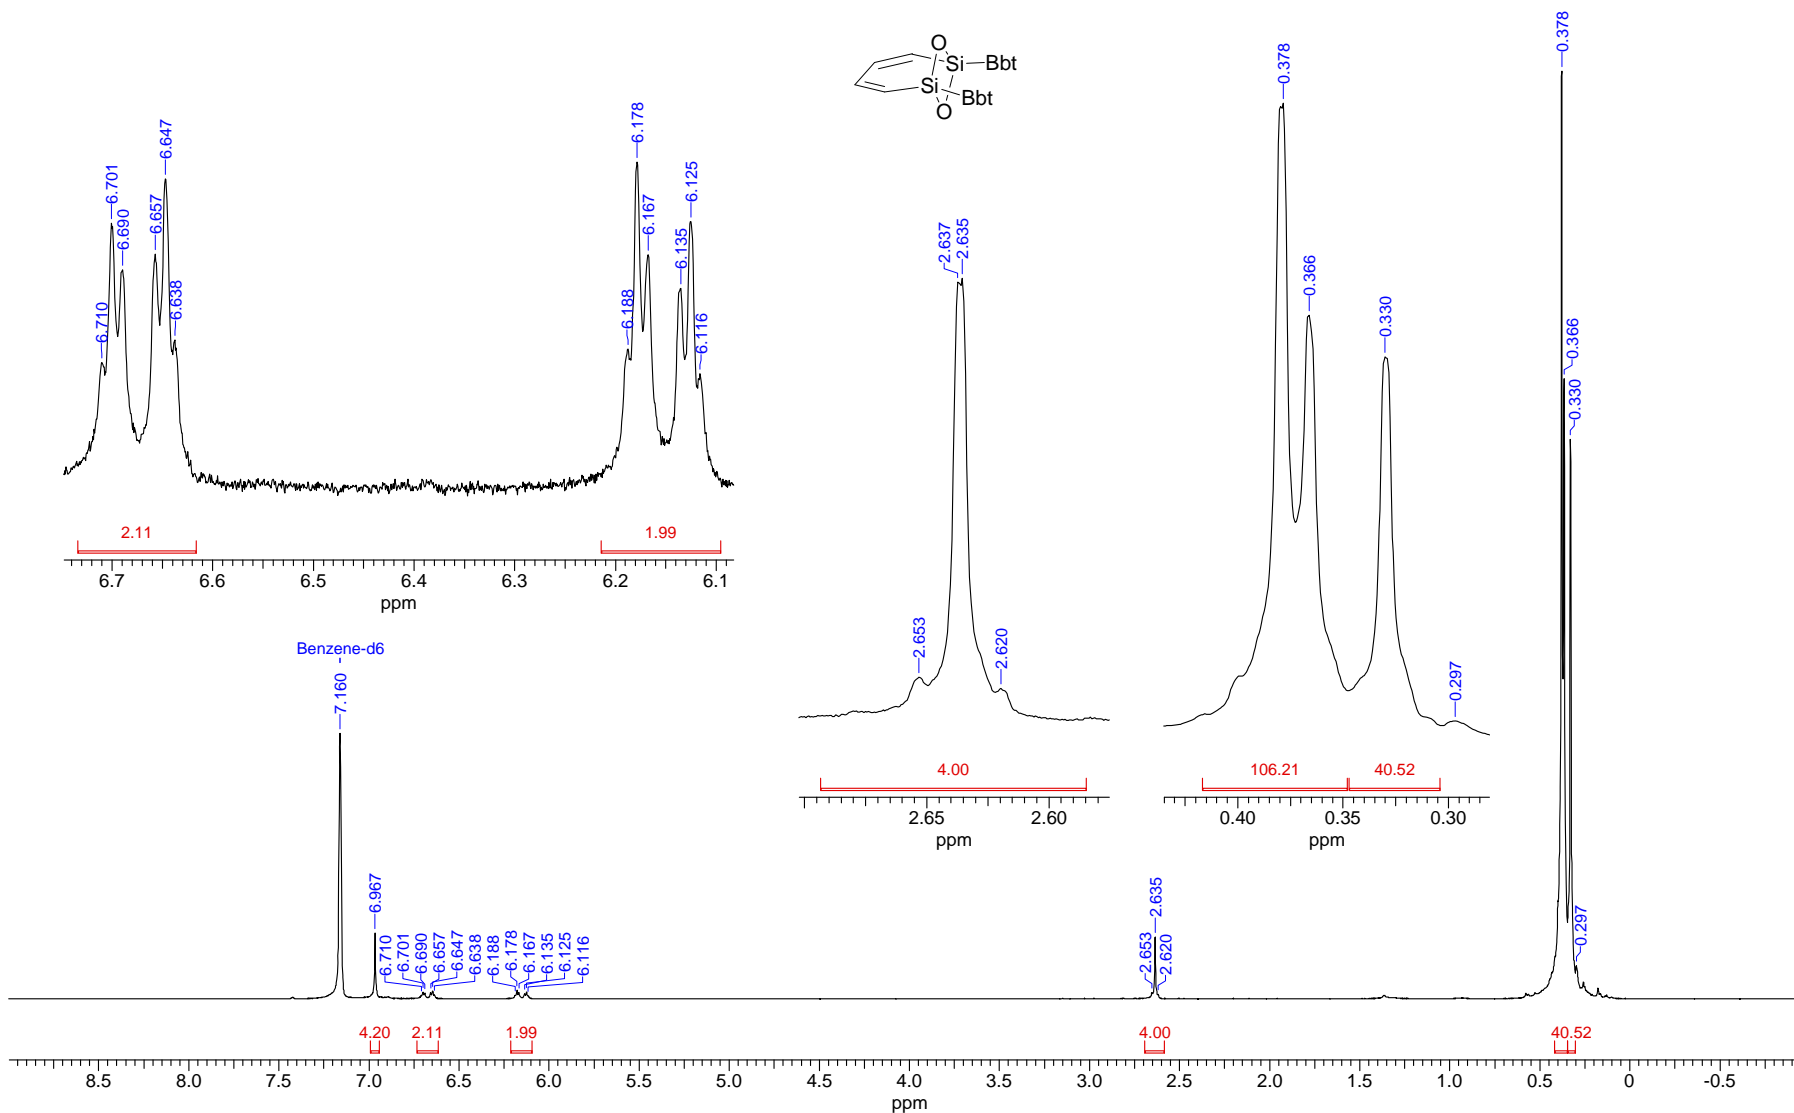

Fig. S-13. <sup>1</sup>H NMR spectrum of 6.

|                               |                                  |                        |       |                     |                          |                         |                          |
|-------------------------------|----------------------------------|------------------------|-------|---------------------|--------------------------|-------------------------|--------------------------|
| <b>Acquisition Time (sec)</b> | 1.6221                           | <b>Comment</b>         | auto  | <b>Date</b>         | Thu Nov 05 18:04:38 2009 | <b>Date Stamp</b>       | Thu Nov 05 18:04:38 2009 |
| <b>File Name</b>              | D:\HJS\KYOTO-U\NMR\091105-1-C.DX | <b>Frequency (MHz)</b> | 74.88 | <b>Nucleus</b>      | 13C                      | <b>Origin</b>           | JEOL                     |
| <b>Original Points Count</b>  | 32768                            | <b>Owner</b>           | GUEST | <b>Points Count</b> | 32768                    | <b>Sweep Width (Hz)</b> | 20201.40                 |

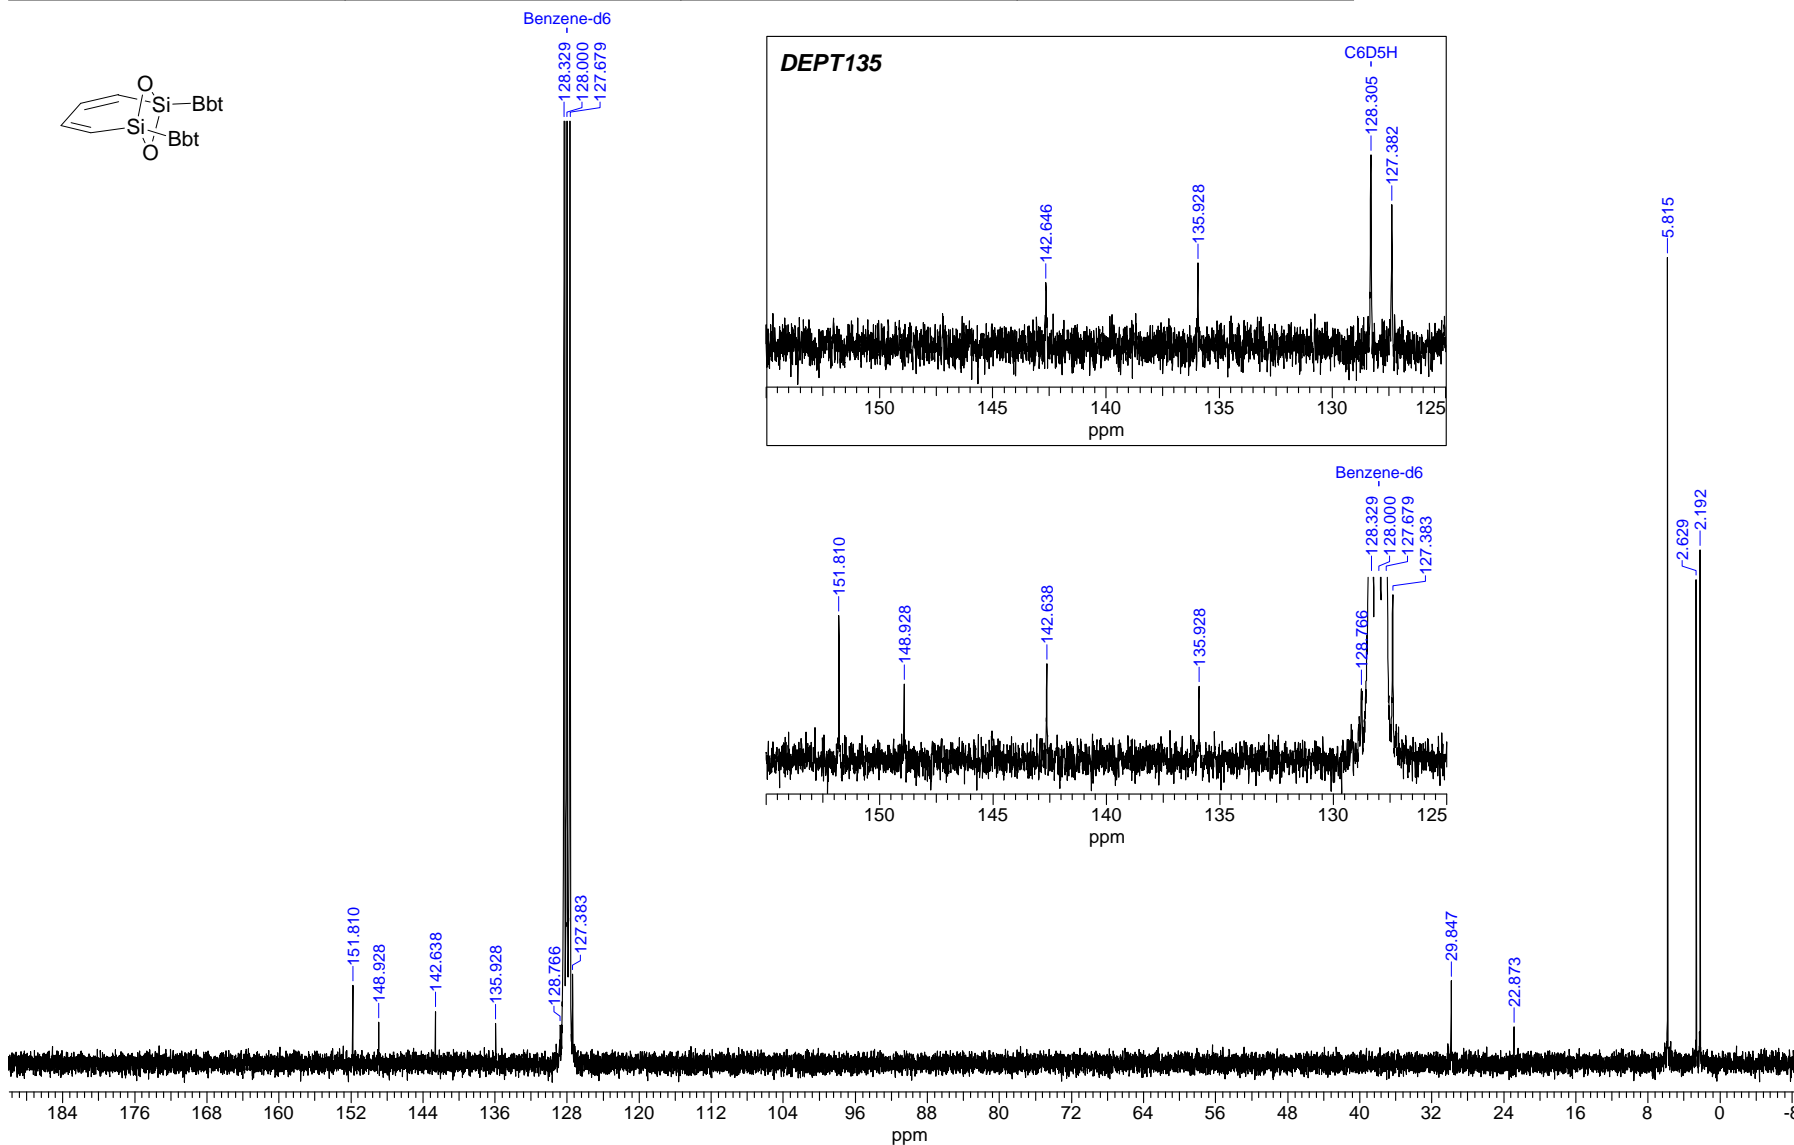

Fig. S-14.  $^{13}\text{C}\{^1\text{H}\}$  and  $^{13}\text{C}$  DEPT135 NMR spectra of **6**.

|                               |                          |                         |                                     |                              |                          |
|-------------------------------|--------------------------|-------------------------|-------------------------------------|------------------------------|--------------------------|
| <b>Acquisition Time (sec)</b> | 0.8192                   | <b>Comment</b>          | C6D6, 5ms 10ms                      | <b>Date</b>                  | Thu Nov 05 19:44:59 2009 |
| <b>Date Stamp</b>             | Thu Nov 05 19:44:59 2009 | <b>File Name</b>        | D:\HJS\KYOTO-U\NMR\091105-1-0510.DX | <b>Frequency (MHz)</b>       | 59.16                    |
| <b>Nucleus</b>                | <sup>29</sup> Si         | <b>Origin</b>           | JEOL                                | <b>Original Points Count</b> | 32768                    |
| <b>Solvent</b>                | BENZENE-D6               | <b>Sweep Width (Hz)</b> | 39998.78                            | <b>Owner</b>                 | GUEST                    |
|                               |                          | <b>Points Count</b>     | 32768                               |                              |                          |

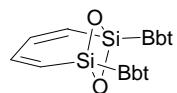

<sup>29</sup>Si INEPT

PI1 = 5 ms

PI2 = 10 ms

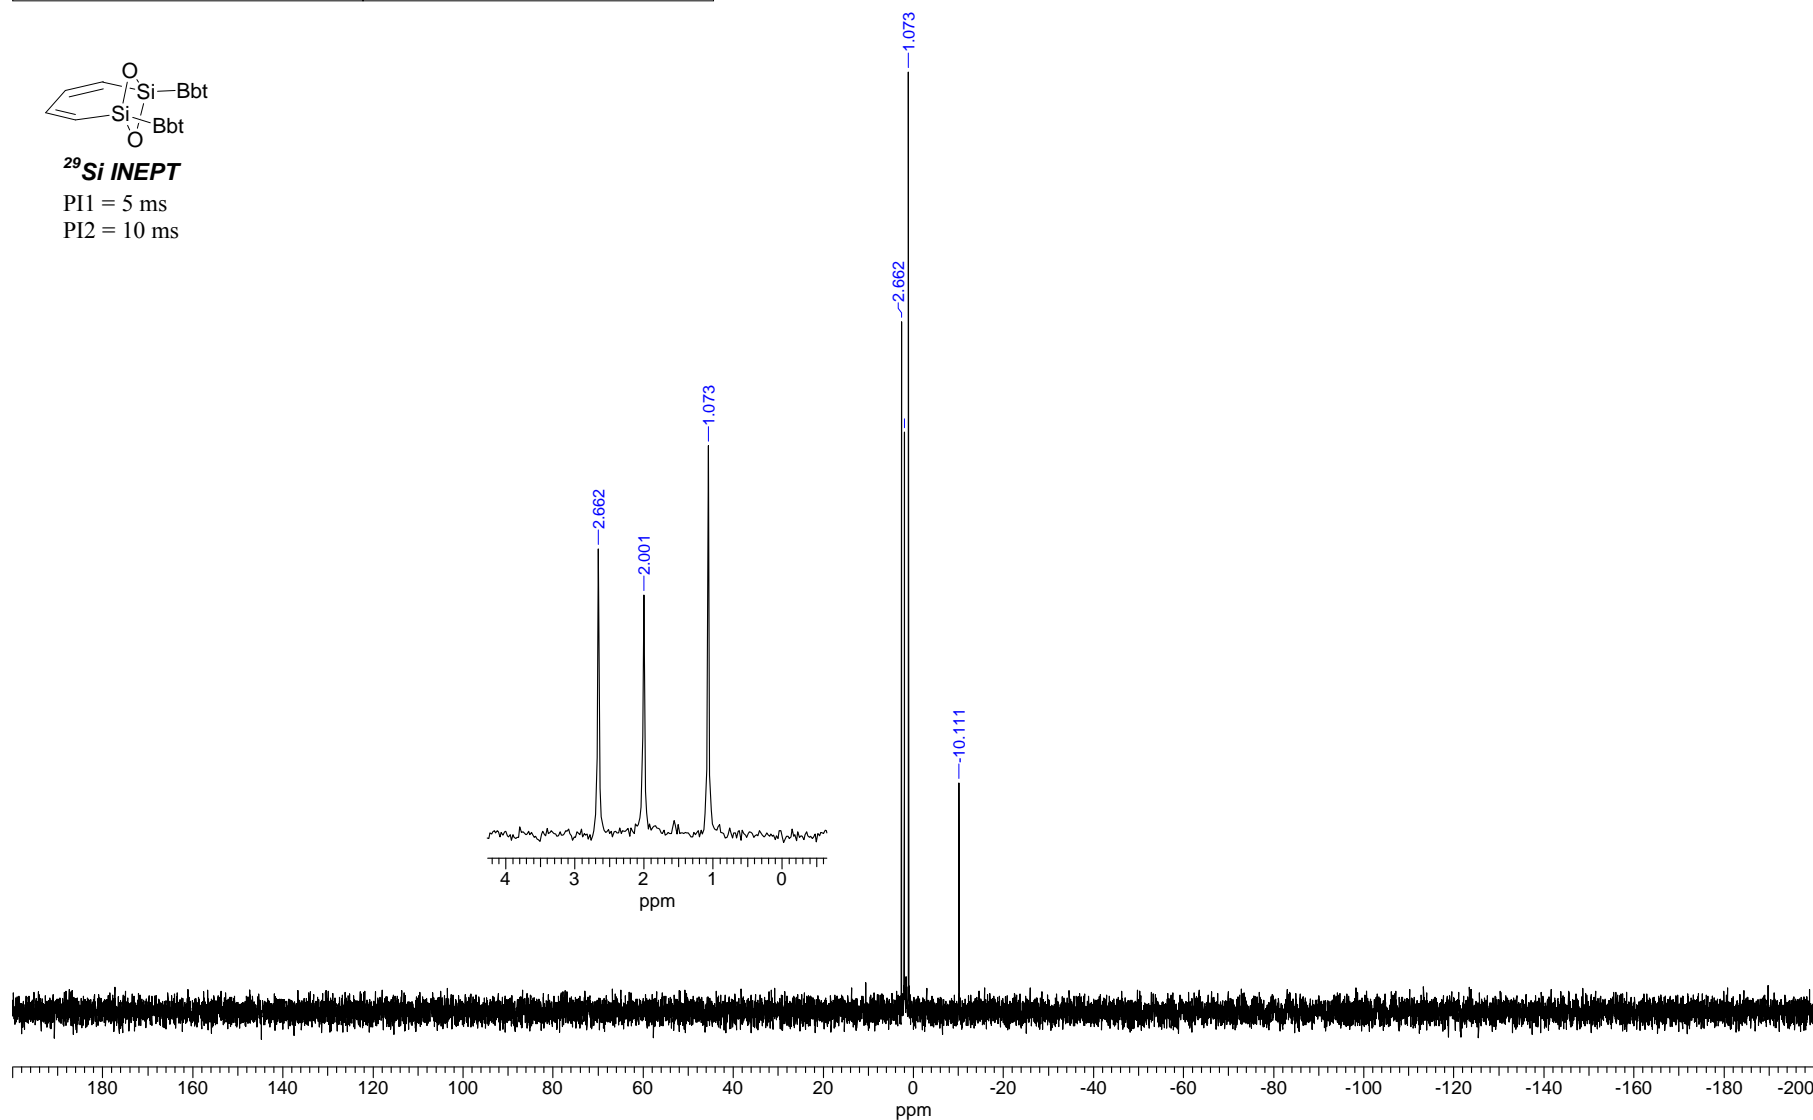

Fig. S-15. <sup>29</sup>Si INEPT NMR spectrum of **6**.
